# Supplementary material for: Pericytes control vascular stability and auditory spiral ganglion neuron survival
Source: eLife journal article supplement (doi:10.7554/elife.83486), 2023-01-27

### VEGFA

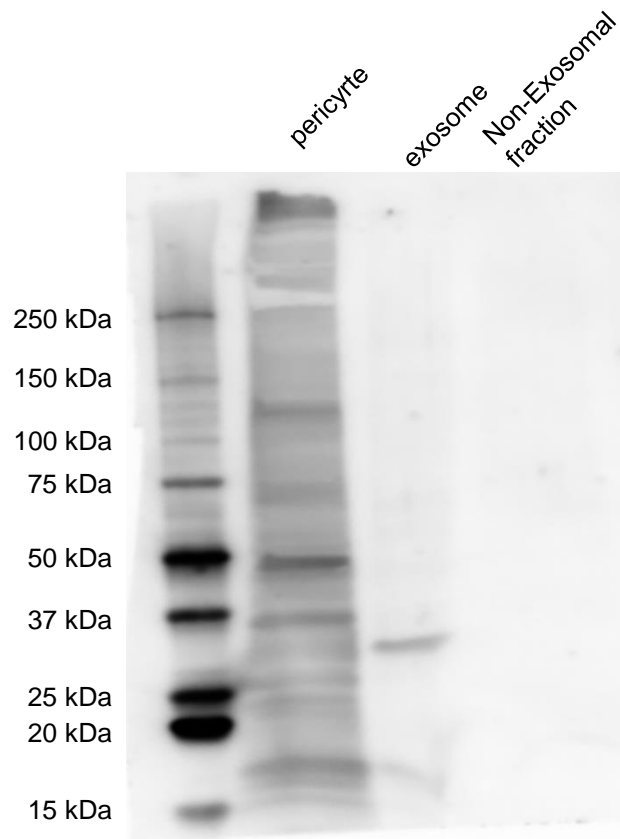

### PDGFR- $\beta$

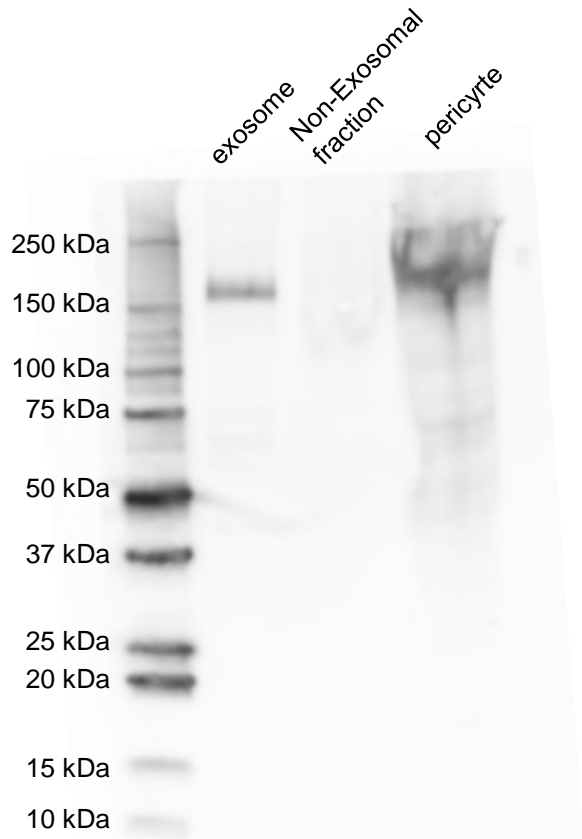

### Gel staining of whole protein

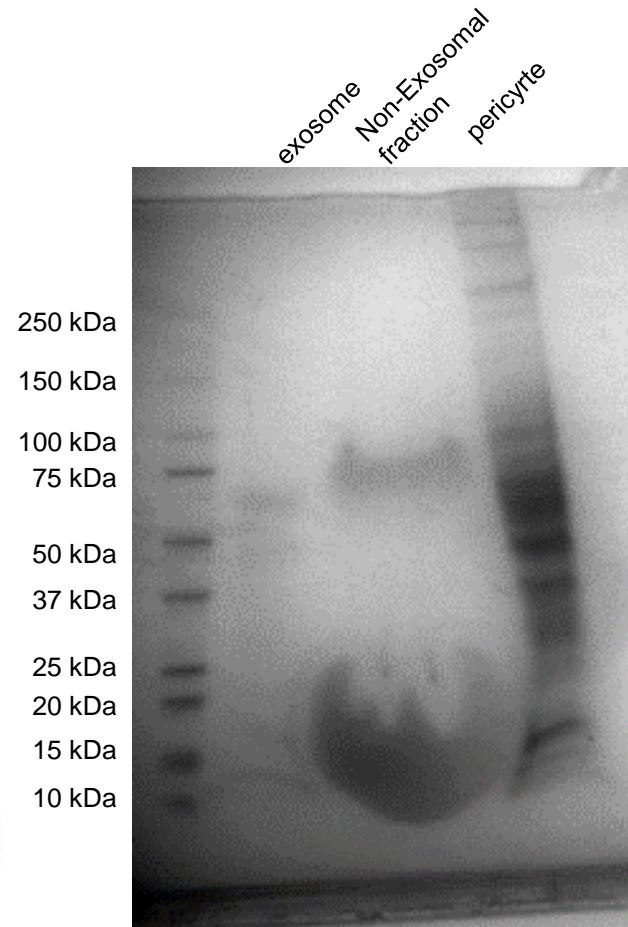

Supplement: fig7-data2 [file elife-83486-fig7-data2-v2.pdf]
