# Supplementary material for: Pericytes control vascular stability and auditory spiral ganglion neuron survival
Source: eLife. 2023 Jan 31;12:e83486. doi: 10.7554/eLife.83486 (PMC9940910; doi:10.7554/eLife.83486)
Supplement: Table 1—source data 1. [file elife-83486-table1-data1.xlsx]

## Sheet: Sheet1
#gene_index	gene_id	gene_name	gene_coordinates	RPKM	read_count
3769	Zzz3	Zzz3	chr3:152059658-152125790	0.6102	67
12848	Zzef1	Zzef1	chr11:72609728-72740622	0.6836	111
6416	Zyx	Zyx	chr6:42299827-42308394	21.91	778
4324	Zyg11b	Zyg11b	chr4:107900360-107973695	0.4249	65.92
6801	Zxdc	Zxdc	chr6:90319488-90353480	0.683	41
19823	Zxdb	Zxdb	chrX:91969908-91975530	0.03663	3
19824	Zxda	Zxda	chrX:92036624-92043628	0.1078	10.99
11574	Zwint	Zwint	chr10:72117643-72132537	17.68	689
10697	Zwilch	Zwilch	chr9:63984953-64020738	1.209	49
10533	Zw10	Zw10	chr9:48863737-48886878	2.751	114
11381	Zufsp	Zufsp	chr10:33646742-33671018	1.104	38
12656	Zswim7	Zswim7	chr11:62080726-62094897	10.87	119
15046	Zswim6	Zswim6	chr13:108514698-108680258	0.302	24
4409	Zswim5	Zswim5	chr4:116550007-116661710	0.02545	2
9648	Zswim4	Zswim4	chr8:86734841-86760941	0.3159	20
2683	Zswim3	Zswim3	chr2:164630614-164647627	0.4086	16
1706	Zswim2	Zswim2	chr2:83755236-83781383	0	0
2684	Zswim1	Zswim1	chr2:164648186-164652367	2.974	117
7381	Zscan5b	Zscan5b	chr7:6173880-6191014	0.03487	1
7439	Zscan4f	Zscan4f	chr7:11983264-11987667	0	0
7438	Zscan4e	Zscan4e	chr7:11891727-11896031	0	0
7437	Zscan4d	Zscan4d	chr7:11746992-11751497	0	0
7436	Zscan4c	Zscan4c	chr7:11591094-11595896	0	0
2206	Zscan29	Zscan29	chr2:120986432-120996885	0.8123	43
7461	Zscan22	Zscan22	chr7:13483164-13493588	0.76	29
6018	Zscan21	Zscan21	chr5:138558133-138575487	3.114	105
4576	Zscan20	Zscan20	chr4:128260783-128287342	0.06391	5
8235	Zscan2	Zscan2	chr7:88006994-88021399	0	0
14422	Zscan12	Zscan12	chr13:21454689-21464171	0.4352	28
17344	Zscan10	Zscan10	chr17:23737823-23747986	0	0
20162	Zrsr2	Zrsr2	chrX:160388318-160396530	0.4972	28
12294	Zrsr1	Zrsr1	chr11:22872029-22874908	0.1431	6
617	Zranb3	Zranb3	chr1:129850763-129998985	1.587	96
3786	Zranb2	Zranb2	chr3:157197361-157211303	9.161	349
8930	Zranb1	Zranb1	chr7:140141305-140175634	0.3551	11
16964	Zpld1	Zpld1	chr16:55225288-55283350	0	0
13263	Zpbp2	Zpbp2	chr11:98412466-98419970	0	0
12256	Zpbp	Zpbp	chr11:11182516-11362411	0	0
14372	Zp4-ps	Zp4-ps	chr13:11614319-11617949	0	0
627	Zp3r	Zp3r	chr1:132473283-132526183	0	0
5959	Zp3	Zp3	chr5:136455975-136464494	0.1564	3
8746	Zp2	Zp2	chr7:127275875-127288804	0	0
18913	Zp1	Zp1	chr19:10988787-10995091	0	0
17999	Znrf4	Znrf4	chr17:56650671-56651906	0	0
12217	Znrf3	Znrf3	chr11:5176332-5344850	0.4356	40
6530	Znrf2	Znrf2	chr6:54766910-54839730	0.453	14
9918	Znrf1	Znrf1	chr8:114060742-114147676	0.4864	22
17778	Znrd1	Znrd1	chr17:37091303-37095373	6.106	61
3739	Znhit6	Znhit6	chr3:145239172-145268209	1.706	69.9
13075	Znhit3	Znhit3	chr11:84724457-84729858	5.938	85
18785	Znhit2	Znhit2	chr19:6061207-6062468	0.1632	3
5978	Znhit1	Znhit1	chr5:137458071-137463752	23.89	359
2714	Znfx1	Znfx1	chr2:166861297-166888515	1.875	197
2705	Zmynd8	Zmynd8	chr2:165609654-165710188	1.081	83
1236	Zmynd19	Zmynd19	chr2:24805322-24814933	0	0
15152	Zmynd17	Zmynd17	chr14:21302086-21316123	0	0
12797	Zmynd15	Zmynd15	chr11:70273124-70279701	0.3677	15
4473	Zmynd12	Zmynd12	chr4:119095289-119126503	0	0
14370	Zmynd11	Zmynd11	chr13:9684082-9764454	1.125	63
11005	Zmynd10	Zmynd10	chr9:107449641-107453650	0	0
4566	Zmym6	Zmym6	chr4:126754627-126801538	0.3986	24
15527	Zmym5	Zmym5	chr14:57409425-57430553	0.5643	43.98
4563	Zmym4	Zmym4	chr4:126539065-126645167	0.2743	28
19868	Zmym3	Zmym3	chrX:98599724-98616188	0.6803	60
15528	Zmym2	Zmym2	chr14:57506631-57579186	0.9309	63
4565	Zmym1	Zmym1	chr4:126724338-126738376	0.7347	41
4494	Zmpste24	Zmpste24	chr4:120731843-120770848	6.086	304
12237	Zmiz2	Zmiz2	chr11:6295128-6306165	1.197	69
15180	Zmiz1	Zmiz1	chr14:26278778-26484195	0.8551	67
12204	Zmat5	Zmat5	chr11:4604681-4637669	9.66	111
9280	Zmat4	Zmat4	chr8:24780133-25173575	0	0
2933	Zmat3	Zmat3	chr3:32233716-32264587	1.068	121
18350	Zmat2	Zmat2	chr18:36953577-36959314	8.184	269
19987	Zmat1	Zmat1	chrX:131505912-131543748	0.1176	6
12680	Zkscan6	Zkscan6	chr11:65620746-65642741	1.163	39
6128	Zkscan5	Zkscan5	chr5:145966112-145982619	1.809	82
14423	Zkscan3	Zkscan3	chr13:21478874-21494624	0.3696	14
8784	Zkscan2	Zkscan2	chr7:130622154-130643963	0	0
12603	Zkscan17	Zkscan17	chr11:59299023-59320142	0.4621	27
4095	Zkscan16	Zkscan16	chr4:58956500-58971227	0	0
6127	Zkscan14	Zkscan14	chr5:145955815-145962751	1.144	33
6017	Zkscan1	Zkscan1	chr5:138526312-138549050	0.9891	119
7395	Zim1	Zim1	chr7:6628154-6649143	0	0
7430	Zik1	Zik1	chr7:11072573-11080730	0.2458	15
15790	Zic5	Zic5	chr14:122858382-122864880	0.05763	2
10878	Zic4	Zic4	chr9:91263810-91284186	0.03359	2
19657	Zic3	Zic3	chrX:55283805-55289807	0.06807	4
15791	Zic2	Zic2	chr14:122874606-122879550	0.3471	15
10877	Zic1	Zic1	chr9:91255183-91260637	0	0
2615	Zhx3	Zhx3	chr2:160596183-160698726	0.1533	10
15966	Zhx2	Zhx2	chr15:57526222-57671387	0.3297	21
15971	Zhx1	Zhx1	chr15:57878558-57908044	2.241	166
551	Zh2c2	Zh2c2	chr1:99666756-99689548	0.5046	15
2832	Zgpat	Zgpat	chr2:181100128-181115498	0.7648	23
8836	Zg16	Zg16	chr7:134193670-134195491	0	0
4332	Zfyve9	Zfyve9	chr4:108311864-108396481	0	0
5246	Zfyve28	Zfyve28	chr5:34537543-34630973	0.05176	3
19199	Zfyve27	Zfyve27	chr19:42245111-42269083	0.6048	48.98
14041	Zfyve26	Zfyve26	chr12:80333334-80397269	0.4398	60
14295	Zfyve21	Zfyve21	chr12:113052481-113066287	3.976	52
6822	Zfyve20	Zfyve20	chr6:92136706-92164805	2.249	171
2161	Zfyve19	Zfyve19	chr2:119034693-119042785	2.853	70
14950	Zfyve16	Zfyve16	chr13:93257704-93300765	1.373	109
14069	Zfyve1	Zfyve1	chr12:84887891-84938097	2.911	164
20203	Zfy2	Zfy2	chrY:1362123-1426357	0	0
20195	Zfy1	Zfy1	chrY:61650-133852	0	0
19816	Zfx	Zfx	chrX:91319970-91368746	1.02	104
11768	Zfr2	Zfr2	chr10:80695908-80714868	0.02055	1
15849	Zfr	Zfr	chr15:12047606-12115205	6.946	465
15926	Zfpm2	Zfpm2	chr15:40486588-40936138	0.1933	14
9997	Zfpm1	Zfpm1	chr8:124806041-124861147	0.02028	1
18789	Zfpl1	Zfpl1	chr19:6080763-6084891	0.2782	5
17271	Zfp97	Zfp97	chr17:17258347-17283842	0.3225	12.98
7637	Zfp94	Zfp94	chr7:25086815-25101623	0.3062	11
7635	Zfp93	Zfp93	chr7:25055437-25062813	0.3326	17
19717	Zfp92	Zfp92	chrX:70656442-70672326	0	0
18972	Zfp91-Cntf	Zfp91-Cntf	chr19:12838019-12870613	0	0
18973	Zfp91	Zfp91	chr19:12840497-12870612	0.336	32
9859	Zfp90	Zfp90	chr8:108939239-108949789	1.331	51
6948	Zfp9	Zfp9	chr6:118411968-118429291	1.394	79.62
14854	Zfp874	Zfp874	chr13:67541370-67552547	0.6388	29.99
11796	Zfp873	Zfp873	chr10:81510872-81524331	0.6867	23
10250	Zfp872	Zfp872	chr9:21992610-22006567	0	0
17585	Zfp871	Zfp871	chr17:32902442-32925232	1.899	300
17588	Zfp870	Zfp870	chr17:33016166-33028548	0.6094	47
14857	Zfp87	Zfp87	chr13:67616718-67627167	1.597	63
9476	Zfp869	Zfp869	chr8:72229037-72240801	2.333	108
9475	Zfp868	Zfp868	chr8:72134553-72149447	1.589	56.98
12602	Zfp867	Zfp867	chr11:59274699-59285976	0.6037	30
6463	Zfp862	Zfp862	chr6:48454338-48484830	0.3033	27
14863	Zfp85-rs1	Zfp85-rs1	chr13:67848737-67856071	0.3405	11
10188	Zfp846	Zfp846	chr9:20385772-20399637	0.7726	31
7791	Zfp84	Zfp84	chr7:30553571-30566438	0.5771	48
14275	Zfp839	Zfp839	chr12:112088489-112107312	0.09709	4
2775	Zfp831	Zfp831	chr2:174469035-174536331	0	0
13028	Zfp830	Zfp830	chr11:82577847-82581124	1.486	70.94
9192	Zfp828	Zfp828	chr8:13869641-13881638	2.345	137
9603	Zfp827	Zfp827	chr8:81552336-81717665	0.1174	13
14903	Zfp825	Zfp825	chr13:74617505-74631398	1.39	28
9889	Zfp821	Zfp821	chr8:112229988-112248832	0.165	5
17326	Zfp820	Zfp820	chr17:21953843-21982726	0.223	12
7800	Zfp82	Zfp82	chr7:30841053-30857842	0.4298	13
7942	Zfp819	Zfp819	chr7:50862539-50873649	0	0
17586	Zfp811	Zfp811	chr17:32933956-32946864	0.1882	6
10254	Zfp810	Zfp810	chr9:22081192-22112082	0.8058	38
17602	Zfp81	Zfp81	chr17:33470673-33495823	0.3657	12
10252	Zfp809	Zfp809	chr9:22030215-22047798	0.9155	19
5056	Zfp804b	Zfp804b	chr5:6769030-7344378	0	0
1702	Zfp804a	Zfp804a	chr2:81893815-82100035	0	0
6274	Zfp800	Zfp800	chr6:28189931-28211601	0.7404	42
17587	Zfp799	Zfp799	chr17:32954149-32967193	0.4691	28.99
9682	Zfp791	Zfp791	chr8:87633066-87646994	0.02944	1
7793	Zfp790	Zfp790	chr7:30601091-30617061	1.146	74
7916	Zfp788	Zfp788	chr7:48888901-48906902	0.3764	21
7378	Zfp787	Zfp787	chr7:6083091-6107573	0.217	6
6452	Zfp786	Zfp786	chr6:47769265-47780504	0.04854	2
7360	Zfp784	Zfp784	chr7:4986048-4990036	0	0
6456	Zfp783	Zfp783	chr6:47893174-47904548	0	0
11795	Zfp781	Zfp781	chr10:81205566-81233887	0	0
7735	Zfp780b	Zfp780b	chr7:28744819-28764176	0.299	23.99
7384	Zfp78	Zfp78	chr7:6316015-6335315	0.059	4
6458	Zfp777	Zfp777	chr6:47974187-47998113	0.04414	2
6469	Zfp775	Zfp775	chr6:48563179-48573226	0.05045	3
8845	Zfp771	Zfp771	chr7:134388040-134398315	0.1675	3
2128	Zfp770	Zfp770	chr2:114019199-114027168	0.03223	2
8849	Zfp768	Zfp768	chr7:134486309-134488828	0.275	9
8853	Zfp764	Zfp764	chr7:134547182-134550336	0.876	31.99
17593	Zfp763	Zfp763	chr17:33153809-33170326	0.4463	22
17325	Zfp760	Zfp760	chr17:21844708-21862603	0.31	19
14844	Zfp759	Zfp759	chr13:67229164-67242723	0.138	7
17331	Zfp758	Zfp758	chr17:22498420-22514248	0.5541	24
13740	Zfp750	Zfp750	chr11:121372291-121380656	0.08472	4
14858	Zfp748	Zfp748	chr13:67639590-67654088	0.5669	38
8850	Zfp747	Zfp747	chr7:134516051-134519564	0.7417	28.99
6459	Zfp746	Zfp746	chr6:48012396-48036592	0.4516	24
16505	Zfp740	Zfp740	chr15:102038698-102046032	1.14	62
7797	Zfp74	Zfp74	chr7:30717810-30736912	0.259	14
12874	Zfp735	Zfp735	chr11:73502280-73527309	0	0
14902	Zfp72	Zfp72	chr13:74508874-74514014	0.6323	15
7941	Zfp719	Zfp719	chr7:50834956-50849080	0.8389	61
7931	Zfp715	Zfp715	chr7:50551893-50568631	1.213	74
19942	Zfp711	Zfp711	chrX:109714135-109748671	0	0
8217	Zfp710	Zfp710	chr7:87169700-87237637	0.4322	28
9562	Zfp709	Zfp709	chr8:74405967-74416464	0.0691	4
14843	Zfp708	Zfp708	chr13:67170334-67198912	0.05624	2
16065	Zfp707	Zfp707	chr15:75799615-75806295	1.097	29
15908	Zfp706	Zfp706	chr15:36926782-36937157	2.394	154
2862	Zfp704	Zfp704	chr3:9427010-9610085	0.4365	88
9309	Zfp703	Zfp703	chr8:28087808-28091934	0.3248	15
16112	Zfp7	Zfp7	chr15:76709706-76722824	0.7979	32
3443	Zfp697	Zfp697	chr3:98186404-98235872	0.07978	6
12553	Zfp692	Zfp692	chr11:58120571-58128115	0.1456	4
4462	Zfp691	Zfp691	chr4:118842123-118846800	0.1301	3
4491	Zfp69	Zfp69	chr4:120602744-120624306	0	0
8855	Zfp689	Zfp689	chr7:134585650-134592672	0.2086	11
8854	Zfp688	Zfp688	chr7:134562478-134565536	0.9537	18
3351	Zfp687	Zfp687	chr3:94810624-94819160	0.504	34
6034	Zfp68	Zfp68	chr5:139044880-139060971	2.308	159
17319	Zfp677	Zfp677	chr17:21520712-21536229	0.448	19
12554	Zfp672	Zfp672	chr11:58128718-58136615	1.531	69
8873	Zfp668	Zfp668	chr7:135008873-135020337	0.3582	18
7382	Zfp667	Zfp667	chr7:6238182-6259485	0.5237	28
5868	Zfp664	Zfp664	chr5:125343075-125369000	1.262	74.98
2285	Zfp661	Zfp661	chr2:127401271-127410413	0.09916	4
6129	Zfp655	Zfp655	chr5:145992628-146008175	2.968	176
17035	Zfp654	Zfp654	chr16:64780173-64786147	0.1013	7
10244	Zfp653	Zfp653	chr9:21859904-21875789	0.06515	2
13185	Zfp652	Zfp652	chr11:95610381-95626027	0.2061	8
16115	Zfp647	Zfp647	chr15:76740801-76755878	0.4656	15
8874	Zfp646	Zfp646	chr7:135021215-135029510	0.5767	53
5605	Zfp644	Zfp644	chr5:107045760-107125849	0.8085	67
16386	Zfp641	Zfp641	chr15:98116553-98126514	0	0
2736	Zfp64	Zfp64	chr2:168750861-168781087	1.372	55
2936	Zfp639	Zfp639	chr3:32409472-32419754	1.968	55
6939	Zfp637	Zfp637	chr6:117791260-117795974	14.68	235
8863	Zfp629	Zfp629	chr7:134750549-134757947	0.3144	28
7351	Zfp628	Zfp628	chr7:4866819-4873605	0.03897	2
16064	Zfp623	Zfp623	chr15:75771382-75779830	0.7181	26
15865	Zfp622	Zfp622	chr15:25914121-25928237	1.249	51
12427	Zfp62	Zfp62	chr11:49017002-49032318	1.241	71
7908	Zfp619	Zfp619	chr7:46773136-46795785	0.06908	6
4136	Zfp618	Zfp618	chr4:62626608-62795064	0.2634	11
9563	Zfp617	Zfp617	chr8:74446724-74458529	2.073	88.99
9896	Zfp612	Zfp612	chr8:112603662-112614088	0.1189	4
7636	Zfp61	Zfp61	chr7:25076065-25084568	0.8484	29
10727	Zfp609	Zfp609	chr9:65539390-65675371	0.104	13
18498	Zfp608	Zfp608	chr18:55047702-55149567	0.1998	17
7733	Zfp607	Zfp607	chr7:28645604-28665844	0.3716	19
7452	Zfp606	Zfp606	chr7:13063654-13068063	0.05914	2
7731	Zfp60	Zfp60	chr7:28516428-28536708	0.7288	41
17396	Zfp598	Zfp598	chr17:24806697-24818961	0.3969	19
16553	Zfp597	Zfp597	chr16:3861544-3872374	0.2195	18
14849	Zfp595	Zfp595	chr13:67413934-67433496	0.0527	3
4689	Zfp593	Zfp593	chr4:133799221-133801506	0.1737	5
8239	Zfp592	Zfp592	chr7:88138570-88187581	0.4839	34
7732	Zfp59	Zfp59	chr7:28623603-28641793	0.2352	13
7383	Zfp583	Zfp583	chr7:6267267-6282036	0	0
7361	Zfp580	Zfp580	chr7:5003134-5005324	0.1247	2
14856	Zfp58	Zfp58	chr13:67591103-67601458	0.9313	31.99
7355	Zfp579	Zfp579	chr7:4944454-4947703	0.159	5
7649	Zfp575	Zfp575	chr7:25368857-25372660	0	0
7666	Zfp574	Zfp574	chr7:25862303-25867497	0.04313	1.974
17782	Zfp57	Zfp57	chr17:37139487-37147552	1.993	49
7798	Zfp568	Zfp568	chr7:30768976-30810130	0.1029	6
7801	Zfp566	Zfp566	chr7:30862356-30875529	0.5276	13
17595	Zfp563	Zfp563	chr17:33226312-33247649	0.2367	22
10184	Zfp560	Zfp560	chr9:20149580-20189602	0.3773	26
10146	Zfp558	Zfp558	chr9:18258499-18278003	0.2326	13
8844	Zfp553	Zfp553	chr7:134376957-134381374	0	0
7451	Zfp551	Zfp551	chr7:13000497-13007840	0.4115	14
7500	Zfp541	Zfp541	chr7:16657291-16681677	0	0
17320	Zfp54	Zfp54	chr17:21560191-21572348	0.7852	29
7899	Zfp536	Zfp536	chr7:38264128-38554771	0.03113	2
18565	Zfp532	Zfp532	chr18:65739884-65848587	0.3026	22
17322	Zfp53	Zfp53	chr17:21625952-21647441	0.446	20
7669	Zfp526	Zfp526	chr7:26006470-26012524	0.02048	1
7357	Zfp524	Zfp524	chr7:4967110-4970090	1.118	17.99
17509	Zfp523	Zfp523	chr17:28314363-28342829	0.1774	7
18226	Zfp521	Zfp521	chr18:13846725-14002918	1.668	43
17323	Zfp52	Zfp52	chr17:21672503-21699565	1.302	60
5298	Zfp518b	Zfp518b	chr5:39059719-39075989	0.08066	8
19175	Zfp518	Zfp518	chr19:40969195-40992437	0.2409	24
18651	Zfp516	Zfp516	chr18:83125011-83172107	0.1117	8
5205	Zfp513	Zfp513	chr5:31501354-31504606	0.2546	8
5212	Zfp512	Zfp512	chr5:31754809-31784124	0.5835	28
8970	Zfp511	Zfp511	chr7:147222290-147226504	0.6242	10
17321	Zfp51	Zfp51	chr17:21587316-21602553	1.48	56
5291	Zfp509	Zfp509	chr5:38591283-38611667	0.253	11
7897	Zfp507	Zfp507	chr7:36557369-36588008	0.2362	23
15173	Zfp503	Zfp503	chr14:22803184-22808823	0.09779	6
6130	Zfp498	Zfp498	chr5:146044212-146052338	0.1376	4
14864	Zfp493	Zfp493	chr13:67880630-67890015	0.231	11
15265	Zfp488	Zfp488	chr14:34780258-34791950	0.4947	30.97
18488	Zfp474	Zfp474	chr18:52775569-52799484	0	0
7990	Zfp473	Zfp473	chr7:51986856-52003987	0	0
17591	Zfp472	Zfp472	chr17:33102776-33116156	0.7639	26
6461	Zfp467	Zfp467	chr6:48377691-48395824	0.2135	3
4073	Zfp462	Zfp462	chr4:54960817-55096435	0.1243	19
4734	Zfp46	Zfp46	chr4:135841984-135849857	0.2221	15
14853	Zfp459	Zfp459	chr13:67506658-67522354	0.3064	14.82
14847	Zfp458	Zfp458	chr13:67355854-67370004	0.1181	6
14848	Zfp457	Zfp457	chr13:67393387-67407348	0	0
14851	Zfp456	Zfp456	chr13:67464520-67476699	0.1852	11
14846	Zfp455	Zfp455	chr13:67295442-67310234	0.1266	5
12464	Zfp454	Zfp454	chr11:50686225-50700945	0.334	10
103	Zfp451	Zfp451	chr1:33818598-33871272	0.3763	20
19639	Zfp449	Zfp449	chrX:53599577-53618851	1.176	64
7465	Zfp446	Zfp446	chr7:13563197-13569658	0.385	18
11206	Zfp445	Zfp445	chr9:122760141-122775069	0.888	52
7379	Zfp444	Zfp444	chr7:6124115-6144706	0.03261	2
18190	Zfp438	Zfp438	chr18:5210029-5334432	0.1714	8
14852	Zfp429	Zfp429	chr13:67490265-67500703	0.6082	17.99
7645	Zfp428	Zfp428	chr7:25292106-25300700	0	0
10186	Zfp426	Zfp426	chr9:20272993-20297190	0.8636	43
9701	Zfp423	Zfp423	chr8:90185709-90483494	0.1119	8
17599	Zfp422-rs1	Zfp422-rs1	chr17:33376452-33392090	1.188	64.97
6934	Zfp422	Zfp422	chr6:116574034-116578995	3.775	174
7795	Zfp420	Zfp420	chr7:30644998-30662320	0.2678	13
9377	Zfp42	Zfp42	chr8:44380421-44392363	0	0
7401	Zfp418	Zfp418	chr7:7124064-7136271	0.2035	8
17607	Zfp414	Zfp414	chr17:33766047-33768656	8.299	135
14085	Zfp410	Zfp410	chr12:85658080-85684674	4.38	148
16053	Zfp41	Zfp41	chr15:75447115-75455725	1.148	59
1982	Zfp408	Zfp408	chr2:91483845-91489948	0.5508	30
17337	Zfp40	Zfp40	chr17:23310836-23330195	0.3535	21
6453	Zfp398	Zfp398	chr6:47785694-47818256	0.1352	6
18256	Zfp397os	Zfp397os	chr18:24129476-24140056	0	0
18255	Zfp397	Zfp397	chr18:24113189-24123171	0.5132	41
15603	Zfp395	Zfp395	chr14:65977513-66017767	0.1133	6.978
12584	Zfp39	Zfp39	chr11:58701655-58717727	0.4766	27
14428	Zfp389	Zfp389	chr13:21596185-21598393	0	0
14326	Zfp386	Zfp386	chr12:117285935-117299062	2.978	85
13357	Zfp385c	Zfp385c	chr11:100488860-100512007	0	0
1686	Zfp385b	Zfp385b	chr2:77248689-77541329	0.02569	0.9989
16540	Zfp385a	Zfp385a	chr15:103144326-103170517	0.4495	15
7048	Zfp384	Zfp384	chr6:124959823-124987887	0.1795	8
7803	Zfp382	Zfp382	chr7:30906967-30920051	0.407	13
4122	Zfp37	Zfp37	chr4:61850577-61869580	0.5756	30
19635	Zfp36l3	Zfp36l3	chrX:51075863-51079571	0	0
18137	Zfp36l2	Zfp36l2	chr17:84583269-84587287	4.063	209
14043	Zfp36l1	Zfp36l1	chr12:81208747-81214000	1.634	70.99
14839	Zfp369	Zfp369	chr13:65380162-65399103	0.1197	5
14827	Zfp367	Zfp367	chr13:64234365-64254507	0.8854	45
14999	Zfp366	Zfp366	chr13:99954778-100016987	0	0
11556	Zfp365	Zfp365	chr10:67348853-67375410	1.5	93
4580	Zfp362	Zfp362	chr4:128450329-128483356	0.2859	12
7749	Zfp36	Zfp36	chr7:29161803-29164247	6.264	161
9113	Zfp358	Zfp358	chr8:3493138-3497208	0.03435	1
12461	Zfp354c	Zfp354c	chr11:50624587-50641233	0.7037	55
12466	Zfp354b	Zfp354b	chr11:50735288-50745137	0.1652	6
12472	Zfp354a	Zfp354a	chr11:50872759-50886301	0.1704	9.996
9374	Zfp353	Zfp353	chr8:43164627-43169733	0.3361	25
4228	Zfp352	Zfp352	chr4:89885511-89892378	0	0
18257	Zfp35	Zfp35	chr18:24148135-24163872	1.675	74
14738	Zfp346	Zfp346	chr13:55206670-55236432	0.4963	26
2444	Zfp345	Zfp345	chr2:150296727-150310799	0.1776	6.998
2536	Zfp341	Zfp341	chr2:154439104-154472553	0.0213	1
2690	Zfp335	Zfp335	chr2:164717392-164737250	0.4357	29
2699	Zfp334	Zfp334	chr2:165202936-165213759	0.2456	18
9617	Zfp330	Zfp330	chr8:85287519-85298025	5.855	140
7458	Zfp329	Zfp329	chr7:13389127-13404209	0.1645	19
5603	Zfp326	Zfp326	chr5:106305621-106344831	0.3137	12
7464	Zfp324	Zfp324	chr7:13551213-13559171	0.2882	18
14494	Zfp322a	Zfp322a	chr13:23444973-23461071	0.7666	54
9766	Zfp319	Zfp319	chr8:97850036-97855850	0.06688	4
17892	Zfp318	Zfp318	chr17:46520715-46551766	0.1757	20
10167	Zfp317	Zfp317	chr9:19426572-19454175	2.187	127
6091	Zfp316	Zfp316	chr5:144011374-144031701	1.119	112.3
19487	Zfp300	Zfp300	chrX:20656276-20666355	0.08845	6
7792	Zfp30	Zfp30	chr7:30569809-30579559	0.2373	9
12815	Zfp3	Zfp3	chr11:70577949-70586431	0	0
7590	Zfp296	Zfp296	chr7:20163165-20166004	0.2312	4
17174	Zfp295	Zfp295	chr16:98168599-98183786	0.6319	54
3904	Zfp292	Zfp292	chr4:34750359-34830197	0.2065	30
12665	Zfp287	Zfp287	chr11:62524988-62542595	0.04103	3
12666	Zfp286	Zfp286	chr11:62591889-62602919	0.4112	18
6454	Zfp282	Zfp282	chr6:47827554-47858483	0.1973	15
730	Zfp281	Zfp281	chr1:138521478-138526968	0.4169	32
19600	Zfp280c	Zfp280c	chrX:45894803-45945310	0.3312	21
11602	Zfp280b	Zfp280b	chr10:75495357-75505714	0.155	11
7385	Zfp28	Zfp28	chr7:6336028-6349347	0.2319	14
13882	Zfp277	Zfp277	chr12:41041633-41172377	2.878	87
10027	Zfp276	Zfp276	chr8:125778095-125794451	0.1126	8
19716	Zfp275	Zfp275	chrX:70587959-70604418	0.56	52
14865	Zfp273	Zfp273	chr13:67914753-67927937	0.08875	3
7796	Zfp27	Zfp27	chr7:30678356-30691123	0.4864	25
16550	Zfp263	Zfp263	chr16:3744099-3750788	0.6142	29
7802	Zfp260	Zfp260	chr7:30880095-30892633	3.954	214
10185	Zfp26	Zfp26	chr9:20232762-20264604	0.4515	75
10520	Zfp259	Zfp259	chr9:46081147-46090725	0.2072	9
16111	Zfp251	Zfp251	chr15:76682574-76701865	0.2942	15
6947	Zfp248	Zfp248	chr6:118377337-118405524	0.7313	38.99
6940	Zfp239	Zfp239	chr6:117813095-117822784	0.6591	27
1018	Zfp238	Zfp238	chr1:179374792-179380897	0.05365	3
18650	Zfp236	Zfp236	chr18:82762989-82862126	0.2682	37
7630	Zfp235	Zfp235	chr7:24919182-24928260	0.6962	35
15418	Zfp219	Zfp219	chr14:52625752-52640408	0.2103	9
2738	Zfp217	Zfp217	chr2:169934143-169968175	0.1211	10
17342	Zfp213	Zfp213	chr17:23693736-23701193	0.1028	4
6455	Zfp212	Zfp212	chr6:47870567-47882626	1.553	61
13012	Zfp207	Zfp207	chr11:80196781-80209750	24.57	812
10437	Zfp202	Zfp202	chr9:39999911-40020774	0.1392	7
12465	Zfp2	Zfp2	chr11:50712214-50729663	0.5566	25
14429	Zfp192	Zfp192	chr13:21605091-21622980	0.1249	16
18258	Zfp191	Zfp191	chr18:24170768-24179272	1.888	86
4051	Zfp189	Zfp189	chr4:49534089-49544417	0.3671	16
14425	Zfp187	Zfp187	chr13:21534044-21545596	1.135	65.97
19701	Zfp185	Zfp185	chrX:70232678-70276882	0	0
14454	Zfp184	Zfp184	chr13:22036963-22052354	0.1524	6
19485	Zfp182	Zfp182	chrX:20603310-20639164	0.1276	11
7628	Zfp180	Zfp180	chr7:24866963-24892234	0.5277	26
16552	Zfp174	Zfp174	chr16:3847223-3858880	0.1156	10
14677	Zfp169	Zfp169	chr13:48583029-48608763	0.2983	18
18061	Zfp161	Zfp161	chr17:69733318-69739884	0.886	46
17314	Zfp160	Zfp160	chr17:21145905-21165820	0.8142	45
6032	Zfp157	Zfp157	chr5:138882704-138901922	0.6203	47.92
16843	Zfp148	Zfp148	chr16:33380861-33503989	0.5242	72
7804	Zfp146	Zfp146	chr7:30946287-30954746	0.8118	24
8678	Zfp143	Zfp143	chr7:117205216-117238906	1.39	61
349	Zfp142	Zfp142	chr1:74611702-74634602	0.386	42
7799	Zfp14	Zfp14	chr7:30821378-30836415	0.1202	6
17343	Zfp13	Zfp13	chr17:23712819-23736454	0.1926	6
7460	Zfp128	Zfp128	chr7:13466556-13478771	0.0722	4
2439	Zfp120	Zfp120	chr2:149940143-149962414	1.375	82
6090	Zfp12	Zfp12	chr5:143996887-144009649	0.3852	23.96
17972	Zfp119	Zfp119	chr17:56004192-56018195	0.5194	15
7631	Zfp114	Zfp114	chr7:24960064-24967337	0.06142	2
6019	Zfp113	Zfp113	chr5:138580930-138596972	0.6989	65.86
7629	Zfp112	Zfp112	chr7:24897339-24912971	0.03916	2
7632	Zfp111	Zfp111	chr7:24978234-24993168	0.4235	44
7459	Zfp110	Zfp110	chr7:13420159-13435933	1.683	87
5888	Zfp11	Zfp11	chr5:130160470-130175963	0.4734	27
7633	Zfp109	Zfp109	chr7:25012814-25022617	0.09999	4
7634	Zfp108	Zfp108	chr7:25039813-25047463	0.2609	9.998
2192	Zfp106	Zfp106	chr2:120332566-120389567	1.034	137
11207	Zfp105	Zfp105	chr9:122832196-122840146	0.1028	3
17603	Zfp101	Zfp101	chr17:33517124-33531582	0.4526	18
9920	Zfp1	Zfp1	chr8:114167343-114194911	0.7871	21
6702	Zfml	Zfml	chr6:83864361-83936855	1.58	146
2851	Zfhx4	Zfhx4	chr3:5218554-5415855	0.485	98
9880	Zfhx3	Zfhx3	chr8:111238544-111485536	1.416	339
15468	Zfhx2as	Zfhx2as	chr14:55691928-55694711	0	0
15467	Zfhx2	Zfhx2	chr14:55680496-55710885	0.03935	5
11951	Zfc3h1	Zfc3h1	chr10:114822015-114869827	0.2369	24
16013	Zfat	Zfat	chr15:67915301-68090418	0.5534	36
8270	Zfand6	Zfand6	chr7:91763564-91827861	6.751	163
19036	Zfand5	Zfand5	chr19:21346768-21356779	0.6784	28
17547	Zfand3	Zfand3	chr17:30142032-30346965	1.443	55
367	Zfand2b	Zfand2b	chr1:75165220-75168199	3.142	55
6050	Zfand2a	Zfand2a	chr5:139947171-139960445	3.418	154
2871	Zfand1	Zfand1	chr3:10339956-10351301	3.539	82
11465	Zfa	Zfa	chr10:52262124-52265545	0	0
1374	Zer1	Zer1	chr2:29952803-29979974	0.08374	5
1534	Zeb2	Zeb2	chr2:44839154-44968799	1.334	177
18191	Zeb1	Zeb1	chr18:5591889-5774909	0.8422	64
19594	Zdhhc9	Zdhhc9	chrX:45525148-45561879	0.09171	4
16697	Zdhhc8	Zdhhc8	chr16:18220846-18235229	0.127	9
9974	Zdhhc7	Zdhhc7	chr8:122604995-122625372	0.3609	15
19309	Zdhhc6	Zdhhc6	chr19:55372789-55390522	9.24	292
1714	Zdhhc5	Zdhhc5	chr2:84528077-84555321	1.492	103
6093	Zdhhc4	Zdhhc4	chr5:144078170-144090905	8.042	156
11212	Zdhhc3	Zdhhc3	chr9:122983271-123022213	0.3819	28
16301	Zdhhc25	Zdhhc25	chr15:88430732-88431972	0	0
18722	Zdhhc24	Zdhhc24	chr19:4878704-4884508	0.3356	8
16917	Zdhhc23	Zdhhc23	chr16:43969259-43979163	0	0
14127	Zdhhc22	Zdhhc22	chr12:88324331-88329626	0	0
4175	Zdhhc21	Zdhhc21	chr4:82444643-82505565	0.3845	49
15542	Zdhhc20	Zdhhc20	chr14:58451539-58509099	6.17	464.8
9359	Zdhhc2	Zdhhc2	chr8:41509169-41570196	0.08246	3
16830	Zdhhc19	Zdhhc19	chr16:32496367-32507300	0	0
4674	Zdhhc18	Zdhhc18	chr4:133162907-133189344	0.3618	15
11933	Zdhhc17	Zdhhc17	chr10:110380093-110447064	0.7009	33
19190	Zdhhc16	Zdhhc16	chr19:42007962-42018593	2.466	66
19902	Zdhhc15	Zdhhc15	chrX:101733889-101866142	0.412	22
17184	Zdhhc14	Zdhhc14	chr17:5492600-5753891	0.1763	8
8115	Zdhhc13	Zdhhc13	chr7:56044373-56082807	0.7132	25
1373	Zdhhc12	Zdhhc12	chr2:29946464-29949155	6.616	111
14892	Zdhhc11	Zdhhc11	chr13:74101310-74130288	0	0
9824	Zdhhc1	Zdhhc1	chr8:107996325-108020770	0.3343	10
6008	Zcwpw1	Zcwpw1	chr5:138229030-138263848	1.27	41
16350	Zcrb1	Zcrb1	chr15:93216544-93228721	1.828	21.99
14943	Zcchc9	Zcchc9	chr13:91936138-91947301	2.734	61
5839	Zcchc8	Zcchc8	chr5:124148311-124171053	1.073	67
4003	Zcchc7	Zcchc7	chr4:44769440-44945082	0.9575	35
14795	Zcchc6	Zcchc6	chr13:59873240-59924508	1.249	101
19920	Zcchc5	Zcchc5	chrX:104032421-104035982	0	0
5331	Zcchc4	Zcchc4	chr5:53174306-53211004	0.464	13
2477	Zcchc3	Zcchc3	chr2:152237692-152240780	0.06669	3
15184	Zcchc24	Zcchc24	chr14:26531126-26588342	1.413	90
559	Zcchc2	Zcchc2	chr1:107886983-107930654	0.2723	23
20025	Zcchc18	Zcchc18	chrX:133527694-133531462	0.9136	38
4621	Zcchc17	Zcchc17	chr4:129993329-130037190	7.884	162
20069	Zcchc16	Zcchc16	chrX:141123450-141555407	0	0
9990	Zcchc14	Zcchc14	chr8:124123368-124175833	0.3607	30
19896	Zcchc13	Zcchc13	chrX:100825925-100827003	0	0
19521	Zcchc12	Zcchc12	chrX:33735899-33739153	0	0
4328	Zcchc11	Zcchc11	chr4:108132031-108232020	0.2949	26
12498	Zcchc10	Zcchc10	chr11:53138191-53146803	3.988	73
19829	Zc4h2	Zc4h2	chrX:92834536-92853771	0.8968	28
6302	Zc3hc1	Zc3hc1	chr6:30316388-30341010	8.774	236
6351	Zc3hav1l	Zc3hav1l	chr6:38241872-38249259	0.06667	2
6352	Zc3hav1	Zc3hav1	chr6:38265672-38304603	1.254	62
2298	Zc3h8	Zc3h8	chr2:128752004-128769756	0.6135	14
16219	Zc3h7b	Zc3h7b	chr15:81575278-81626699	0.4034	35
16617	Zc3h7a	Zc3h7a	chr16:11136688-11176486	1.826	100
2299	Zc3h6	Zc3h6	chr2:128793138-128844299	0.02794	2
7512	Zc3h4	Zc3h4	chr7:16986545-17023045	0.4539	40
16057	Zc3h3	Zc3h3	chr15:75584877-75672338	0.1851	9
9999	Zc3h18	Zc3h18	chr8:124900516-124941260	0.1288	7
1703	Zc3h15	Zc3h15	chr2:83484735-83504773	1.75	50
14162	Zc3h14	Zc3h14	chr12:99985178-100025982	0.6183	32
15687	Zc3h13	Zc3h13	chr14:75684180-75744233	0.2679	24
11258	Zc3h12d	Zc3h12d	chr10:7552268-7590194	0.151	9
10568	Zc3h12c	Zc3h12c	chr9:51920091-51976216	0.112	10
19830	Zc3h12b	Zc3h12b	chrX:92907017-93123309	0.04081	2
4538	Zc3h12a	Zc3h12a	chr4:124795658-124805125	0.07344	3
679	Zc3h11a	Zc3h11a	chr1:135516448-135557957	5.609	359
12082	Zc3h10	Zc3h10	chr10:127980621-127984800	0.3616	11
17487	Zbtb9	Zbtb9	chr17:27110124-27113148	0.3453	14
4593	Zbtb8os	Zbtb8os	chr4:129013270-129024273	10.2	98
4595	Zbtb8b	Zbtb8b	chr4:129103009-129118062	0.06265	3
4594	Zbtb8a	Zbtb8a	chr4:129030876-129055272	0.3697	12
18620	Zbtb7c	Zbtb7c	chr18:75979832-76308218	0	0
3229	Zbtb7b	Zbtb7b	chr3:89181568-89197125	0.1489	8
11762	Zbtb7a	Zbtb7a	chr10:80599016-80614402	0.3195	25
1511	Zbtb6	Zbtb6	chr2:37281022-37286439	0.5896	38.92
4005	Zbtb5	Zbtb5	chr4:45004117-45025284	0.3647	23
4950	Zbtb48	Zbtb48	chr4:151393885-151401780	0.4627	15
2834	Zbtb46	Zbtb46	chr2:181122467-181194131	0.1293	10
7467	Zbtb45	Zbtb45	chr7:13591015-13595149	0.06417	2
10285	Zbtb44	Zbtb44	chr9:30838229-30883470	0.53	68
1451	Zbtb43	Zbtb43	chr2:33305808-33324052	0.5771	42
739	Zbtb41	Zbtb41	chr1:141318960-141349584	0.2053	25
4745	Zbtb40	Zbtb40	chr4:136535647-136604610	0.1719	18
12754	Zbtb4	Zbtb4	chr11:69579414-69597528	0.6582	75
12046	Zbtb39	Zbtb39	chr10:127176594-127184395	0.04616	4
10900	Zbtb38	Zbtb38	chr9:96585842-96632094	0.5875	35
830	Zbtb37	Zbtb37	chr1:162947887-162964390	0.2299	13
1450	Zbtb34	Zbtb34	chr2:33261628-33286844	0.1456	14
19571	Zbtb33	Zbtb33	chrX:35542970-35550223	0.04163	3
7832	Zbtb32	Zbtb32	chr7:31374700-31377961	0	0
18860	Zbtb3	Zbtb3	chr19:8876986-8879344	0.2507	7
1512	Zbtb26	Zbtb26	chr2:37287688-37298641	0.2347	18
14017	Zbtb25	Zbtb25	chr12:77449931-77469986	0.3453	8
11419	Zbtb24	Zbtb24	chr10:41170202-41185380	0.6064	25
17618	Zbtb22	Zbtb22	chr17:34053121-34056270	0.5531	21
16913	Zbtb20	Zbtb20	chr16:43510421-43619183	0.3068	13
11245	Zbtb2	Zbtb2	chr10:5958433-5979467	0.1277	6
4816	Zbtb17	Zbtb17	chr4:141000588-141023852	0.8445	42
10529	Zbtb16	Zbtb16	chr9:48462402-48644050	0.01343	1
17677	Zbtb12	Zbtb12	chr17:35031504-35033789	0	0
2861	Zbtb10	Zbtb10	chr3:9250567-9285330	0.1752	19
14018	Zbtb1	Zbtb1	chr12:77471253-77489437	0.3722	20
2760	Zbp1	Zbp1	chr2:173039237-173044423	24.97	284
16303	Zbed4	Zbed4	chr15:88582141-88614946	0.2428	19
14969	Zbed3	Zbed3	chr13:96095192-96107796	0.145	4
3101	Zbbx	Zbbx	chr3:74841829-74947645	0	0
6178	Zar1l	Zar1l	chr5:151309646-151320734	0	0
5391	Zar1	Zar1	chr5:72968355-72972323	0	0
131	Zap70	Zap70	chr1:36818706-36839661	0	0
5990	Zan	Zan	chr5:137819865-137918292	0.01702	4
18653	Zadh2	Zadh2	chr18:84257550-84266906	1.695	82
20132	Yy2	Yy2	chrX:154004051-154006917	0.0958	4
14255	Yy1	Yy1	chr12:110031521-110054842	0.8568	29
15907	Ywhaz	Ywhaz	chr15:36700525-36723999	29.81	1300
13811	Ywhaq	Ywhaq	chr12:21396190-21423297	64.76	1990
5227	Ywhah	Ywhah	chr5:33361465-33370615	8.681	223
5957	Ywhag	Ywhag	chr5:136384249-136410511	12.87	673
12924	Ywhae	Ywhae	chr11:75546389-75579341	311.8	9426
2643	Ywhab	Ywhab	chr2:163820933-163844323	7.201	291
2886	Ythdf3	Ythdf3	chr3:16083183-16117035	0.6694	50
4633	Ythdf2	Ythdf2	chr4:131740831-131768171	1.92	114
2816	Ythdf1	Ythdf1	chr2:180639082-180655641	0.5414	25
18459	Ythdc2	Ythdc2	chr18:44988319-45049373	0.07632	7
5451	Ythdc1	Ythdc1	chr5:87233515-87265682	0.6111	27
615	Ysk4	Ysk4	chr1:129711849-129736867	0	0
4528	Yrdc	Yrdc	chr4:124528003-124532485	0.3979	9
18081	Ypel5	Ypel5	chr17:73186044-73200535	20.3	848
1716	Ypel4	Ypel4	chr2:84574361-84578034	0	0
8816	Ypel3	Ypel3	chr7:133920489-133924028	0.5044	7
13094	Ypel2	Ypel2	chr11:86749927-86807264	0.3782	27
16660	Ypel1	Ypel1	chr16:17070404-17086781	0.07747	3
631	Yod1	Yod1	chr1:132613904-132618634	0.305	17
1220	Yme1l1	Yme1l1	chr2:23012066-23054156	7.805	444
14102	Ylpm1	Ylpm1	chr12:86337271-86411465	0.4198	43
12230	Ykt6	Ykt6	chr11:5855835-5867783	29.22	1022
5379	Yipf7	Yipf7	chr5:69907917-69933871	0.05741	1
19842	Yipf6	Yipf6	chrX:96133120-96144359	1.216	92
18430	Yipf5	Yipf5	chr18:40364519-40379053	21.14	717
18094	Yipf4	Yipf4	chr17:74888854-74899617	1.268	39
17887	Yipf3	Yipf3	chr17:46385029-46389486	1.282	38
10225	Yipf2	Yipf2	chr9:21393126-21397190	1.871	57
4312	Yipf1	Yipf1	chr4:106987036-107032427	11.89	217
7784	Yif1b	Yif1b	chr7:30023342-30032551	20.81	344
18734	Yif1a	Yif1a	chr19:5088553-5092856	34.21	725
5223	Yes1	Yes1	chr5:32913606-32989430	0.1968	13
11967	Yeats4	Yeats4	chr10:116652198-116661563	0.5856	12
16728	Yeats2	Yeats2	chr16:20141136-20232646	0.4122	36
16665	Ydjc	Ydjc	chr16:17147072-17148936	0	0
12771	Ybx2	Ybx2	chr11:69749401-69755101	0	0
4469	Ybx1	Ybx1	chr4:118949932-118967118	6.08	194
16651	Yars2	Yars2	chr16:16303075-16309721	0.1763	4
4589	Yars	Yars	chr4:128867039-128896851	4.659	195
10106	Yap1	Yap1	chr9:7932001-8004588	2.07	124
16349	Yaf2	Yaf2	chr15:93114329-93167339	2.07	65
13163	Xylt2	Xylt2	chr11:94525161-94538807	0.5013	25
8715	Xylt1	Xylt1	chr7:124524493-124811144	0.08947	4
11163	Xylb	Xylb	chr9:119266499-119302438	0.04059	2
2417	Xrn2	Xrn2	chr2:146838796-146903733	9.728	477
10894	Xrn1	Xrn1	chr9:95855179-95953448	0.1872	15
12011	Xrcc6bp1	Xrcc6bp1	chr10:126305486-126338427	0	0
16229	Xrcc6	Xrcc6	chr15:81846799-81870514	4.875	150
324	Xrcc5	Xrcc5	chr1:72353995-72441527	3.466	129
14935	Xrcc4	Xrcc4	chr13:89988526-90229213	0.9803	21.99
14294	Xrcc3	Xrcc3	chr12:113041404-113052052	0.5103	18
5148	Xrcc2	Xrcc2	chr5:25195634-25211615	0.7687	35.99
7648	Xrcc1	Xrcc1	chr7:25332169-25358457	2.199	69
795	Xpr1	Xpr1	chr1:157122787-157264574	0.2872	32
11996	Xpot	Xpot	chr10:121024436-121063372	0.7338	64
15668	Xpo7	Xpo7	chr14:71054053-71166435	0.1724	37.95
8793	Xpo6	Xpo6	chr7:133245233-133343922	0.9408	61
17885	Xpo5	Xpo5	chr17:46339804-46379248	4.258	230
15536	Xpo4	Xpo4	chr14:58201108-58283793	0.1987	10
12296	Xpo1	Xpo1	chr11:23156041-23197597	2.253	161
16213	Xpnpep3	Xpnpep3	chr15:81230618-81285318	0.488	23
19592	Xpnpep2	Xpnpep2	chrX:45461902-45490158	0.01963	1
19295	Xpnpep1	Xpnpep1	chr19:53065673-53113032	26.48	928
6813	Xpc	Xpc	chr6:91439302-91465882	0.8699	46
4023	Xpa	Xpa	chr4:46188094-46209183	0.1438	2
19715	Xlr5c	Xlr5c	chrX:70530536-70535854	0	0
19709	Xlr5b	Xlr5b	chrX:70394180-70403738	0	0
19706	Xlr5a	Xlr5a	chrX:70352974-70363041	0	0
19713	Xlr4c	Xlr4c	chrX:70479415-70488469	0	0
19711	Xlr4b	Xlr4b	chrX:70459704-70467792	0	0
19704	Xlr4a	Xlr4a	chrX:70319684-70327846	0	0
19714	Xlr3c	Xlr3c	chrX:70499879-70510729	0	0
19710	Xlr3b	Xlr3b	chrX:70437518-70448269	0.04246	1
19705	Xlr3a	Xlr3a	chrX:70331632-70342434	0	0
19636	Xlr	Xlr	chrX:51086925-51100873	5.189	77.99
19970	Xkrx	Xkrx	chrX:130683584-130696467	0.04778	2
36	Xkr9	Xkr9	chr1:13658852-13691804	0	0
4648	Xkr8	Xkr8	chr4:132280819-132288461	0.8101	50
2502	Xkr7	Xkr7	chr2:152857588-152881511	0	0
15589	Xkr6	Xkr6	chr14:64413856-64438853	0	0
9207	Xkr5	Xkr5	chr8:18932729-18950973	0.3874	16
0	Xkr4	Xkr4	chr1:3204563-3661579	0	0
19428	Xk	Xk	chrX:8849910-8890371	0.02723	2
19894	Xist	Xist	chrX:100655712-100678572	1.153	301
1601	Xirp2	Xirp2	chr2:67284059-67364661	0	0
11173	Xirp1	Xirp1	chr9:119923383-119928933	0	0
19581	Xiap	Xiap	chrX:39421013-39462841	0.4508	43
18087	Xdh	Xdh	chr17:74233248-74299522	12.74	851
11226	Xcr1	Xcr1	chr9:123761436-123771246	0.0615	3.988
870	Xcl1	Xcl1	chr1:166861779-166865641	0	0
12218	Xbp1	Xbp1	chr11:5420970-5425875	1.488	39
12837	Xaf1	Xaf1	chr11:72115131-72127235	6.851	259.2
9118	Xab2	Xab2	chr8:3610090-3621296	5.614	217
11511	X99384	X99384	chr10:60782405-60846271	1.462	91
3027	Wwtr1	Wwtr1	chr3:57259571-57379798	0.7091	49
9877	Wwp2	Wwp2	chr8:109960298-110082495	3.882	242
3856	Wwp1	Wwp1	chr4:19536820-19636140	0.5824	43
9938	Wwox	Wwox	chr8:116963596-117876608	1.403	45
9414	Wwc2	Wwc2	chr8:48912964-49075905	0.7786	57
12367	Wwc1	Wwc1	chr11:35652680-35793591	0.1036	5
7873	Wtip	Wtip	chr7:34894567-34918287	0.1754	5
17239	Wtap	Wtap	chr17:13159665-13185125	2.377	71
2050	Wt1	Wt1	chr2:104966686-105013771	0	0
5688	Wscd2	Wscd2	chr5:113919467-114039679	0	0
12828	Wscd1	Wscd1	chr11:71564205-71603148	0	0
5753	Wsb2	Wsb2	chr5:117807314-117828598	3.165	111
12995	Wsb1	Wsb1	chr11:79052884-79068197	6.867	249
14589	Wrnip1	Wrnip1	chr13:32893899-32914479	0.1819	7
9330	Wrn	Wrn	chr8:34344845-34495999	0.1936	18
17158	Wrb	Wrb	chr16:96367026-96379459	5.061	183
12738	Wrap53	Wrap53	chr11:69375256-69392826	2.535	70
13460	Wnt9b	Wnt9b	chr11:103588677-103611135	0	0
12598	Wnt9a	Wnt9a	chr11:59120432-59147054	0.02069	1
19228	Wnt8b	Wnt8b	chr19:44567962-44588763	0	0
18299	Wnt8a	Wnt8a	chr18:34701982-34707715	0	0
16289	Wnt7b	Wnt7b	chr15:85365870-85408500	0	0
6810	Wnt7a	Wnt7a	chr6:91313977-91361363	0	0
356	Wnt6	Wnt6	chr1:74818466-74831893	0	0
6955	Wnt5b	Wnt5b	chr6:119382549-119494365	0.1158	4
15202	Wnt5a	Wnt5a	chr14:29318659-29338620	1.27	79
4746	Wnt4	Wnt4	chr4:136833550-136852694	0	0
12597	Wnt3a	Wnt3a	chr11:59061546-59104253	0	0
13461	Wnt3	Wnt3	chr11:103635489-103679335	0	0
3501	Wnt2b	Wnt2b	chr3:104747723-104764627	0.01922	1
6241	Wnt2	Wnt2	chr6:17938940-17980445	0.2273	7
6251	Wnt16	Wnt16	chr6:22238227-22248522	0.1236	3
8356	Wnt11	Wnt11	chr7:105987355-106003257	0	0
16405	Wnt10b	Wnt10b	chr15:98602193-98608581	0	0
357	Wnt10a	Wnt10a	chr1:74838593-74850747	0	0
16406	Wnt1	Wnt1	chr15:98620288-98624261	0	0
13384	Wnk4	Wnk4	chr11:101121925-101138723	0.1171	7
14683	Wnk2	Wnk2	chr13:49131671-49243383	0	0
6959	Wnk1	Wnk1	chr6:119874356-119987797	1.998	271
17576	Wiz	Wiz	chr17:32491001-32525895	0.1943	12
11399	Wisp3	Wisp3	chr10:38870777-38883600	0	0
2640	Wisp2	Wisp2	chr2:163646570-163658880	6.433	166
16010	Wisp1	Wisp1	chr15:66722955-66754761	2.092	153
6078	Wipi2	Wipi2	chr5:143105538-143145324	0.9305	53
13526	Wipi1	Wipi1	chr11:109434835-109472703	1.776	47
13276	Wipf2	Wipf2	chr11:98725123-98764834	0.2969	23
1651	Wipf1	Wipf1	chr2:73267674-73367467	1.109	71
11991	Wif1	Wif1	chr10:120471060-120537698	0	0
12093	Wibg	Wibg	chr10:128185018-128203146	2.356	21
5240	Whsc2	Whsc2	chr5:34240829-34278907	3.368	106
9295	Whsc1l1	Whsc1l1	chr8:26712778-26788444	0.7188	38
5239	Whsc1	Whsc1	chr5:34163478-34238525	0.2393	17
4144	Whrn	Whrn	chr4:63075944-63156985	0.06844	4
8248	Whamm	Whamm	chr7:88716178-88741722	0.06712	3
5280	Wfs1	Wfs1	chr5:37357343-37380221	0.6165	32
13149	Wfikkn2	Wfikkn2	chr11:94098912-94103863	0.4802	12
17460	Wfikkn1	Wfikkn1	chr17:26014573-26017803	0.02708	1
2671	Wfdc9	Wfdc9	chr2:164475125-164480466	0	0
2668	Wfdc8	Wfdc8	chr2:164422713-164439126	0	0
2669	Wfdc6b	Wfdc6b	chr2:164439200-164443712	0	0
2666	Wfdc6a	Wfdc6a	chr2:164405022-164410677	0	0
2648	Wfdc5	Wfdc5	chr2:164003097-164008477	0	0
2677	Wfdc3	Wfdc3	chr2:164556726-164568767	0.2512	3
2665	Wfdc2	Wfdc2	chr2:164388216-164394006	0	0
2670	Wfdc16	Wfdc16	chr2:164460208-164464302	0	0
2651	Wfdc15b	Wfdc15b	chr2:164040190-164047399	0	0
2650	Wfdc15a	Wfdc15a	chr2:164024608-164025853	0	0
2674	Wfdc13	Wfdc13	chr2:164510607-164513206	0	0
2649	Wfdc12	Wfdc12	chr2:164014967-164016294	0	0
2673	Wfdc11	Wfdc11	chr2:164488394-164499587	0	0
2672	Wfdc10	Wfdc10	chr2:164481546-164482868	0.1491	0.9966
9967	Wfdc1	Wfdc1	chr8:122190265-122211920	0.2937	5
6374	Wee2	Wee2	chr6:40392862-40416814	0	0
8679	Wee1	Wee1	chr7:117265573-117286813	0.4418	22
15973	Wdyhv1	Wdyhv1	chr15:57972991-57990209	2.23	43
4663	Wdtc1	Wdtc1	chr4:132848381-132895230	0.4934	30
1570	Wdsub1	Wdsub1	chr2:59690424-59720663	0.8866	27
8211	Wdr93	Wdr93	chr7:86888049-86930836	0.0601	2
12271	Wdr92	Wdr92	chr11:17111896-17135203	1.501	74.99
6333	Wdr91	Wdr91	chr6:34830426-34860831	2.448	94
17457	Wdr90	Wdr90	chr17:25981679-25998460	0.08951	7.91
14010	Wdr89	Wdr89	chr12:76731582-76770524	12.71	551.8
5138	Wdr86	Wdr86	chr5:24218087-24236498	0.03845	1
1237	Wdr85	Wdr85	chr2:24817942-24828991	1.349	57.99
10970	Wdr82	Wdr82	chr9:106073260-106094037	0.8438	53
12914	Wdr81	Wdr81	chr11:75254446-75268219	0.7654	77
4975	Wdr8	Wdr8	chr4:153516481-153530927	5.365	125
4281	Wdr78	Wdr78	chr4:102710671-102786904	0.03622	2
3510	Wdr77	Wdr77	chr3:105762416-105772678	3.827	198
2221	Wdr76	Wdr76	chr2:121332459-121370595	0.3721	23
193	Wdr75	Wdr75	chr1:45852346-45880458	3.68	140
18852	Wdr74	Wdr74	chr19:8810329-8815114	8.555	150
8236	Wdr73	Wdr73	chr7:88035610-88046155	1.332	41
10786	Wdr72	Wdr72	chr9:73958141-74131010	0	0
15820	Wdr70	Wdr70	chr15:7823055-8049209	2.905	91
18556	Wdr7	Wdr7	chr18:63868349-64149411	1.343	139
414	Wdr69	Wdr69	chr1:83156337-83207145	0	0
15968	Wdr67	Wdr67	chr15:57743754-57801623	1.251	64
3744	Wdr63	Wdr63	chr3:145703491-145771000	0	0
7810	Wdr62	Wdr62	chr7:31025159-31065440	0.3041	21
10591	Wdr61	Wdr61	chr9:54564962-54582335	42.22	739
14328	Wdr60	Wdr60	chr12:117445523-117501498	0.9586	52
11056	Wdr6	Wdr6	chr9:108474644-108481001	14.77	880
16863	Wdr5b	Wdr5b	chr16:36041276-36043060	0.8463	22
9917	Wdr59	Wdr59	chr8:113974108-114045887	0.3986	21
18346	Wdr55	Wdr55	chr18:36919893-36923362	12.24	267
6683	Wdr54	Wdr54	chr6:83102705-83106373	1.573	29
16823	Wdr53	Wdr53	chr16:32247372-32257158	1.628	32
11902	Wdr51b	Wdr51b	chr10:98569805-98660622	0.4029	16
10975	Wdr51a	Wdr51a	chr9:106183732-106252208	2.487	49
1336	Wdr5	Wdr5	chr2:27370667-27392053	0.8056	34
11169	Wdr48	Wdr48	chr9:119804013-119835697	1.42	79
3565	Wdr47	Wdr47	chr3:108394196-108448637	0.5854	36
17622	Wdr46	Wdr46	chr17:34077668-34086640	0.6346	20
13735	Wdr45l	Wdr45l	chr11:121188517-121215761	5.742	196
19385	Wdr45	Wdr45	chrX:7299375-7305327	3.241	74
19493	Wdr44	Wdr44	chrX:23270243-23383127	0.4342	26
18076	Wdr43	Wdr43	chr17:71965555-72008371	3.304	166
14967	Wdr41	Wdr41	chr13:95746303-95793269	0.4035	18
17561	Wdr4	Wdr4	chr17:31631268-31649432	0.4061	23
1524	Wdr38	Wdr38	chr2:38853829-38857104	0	0
14364	Wdr37	Wdr37	chr13:8802214-8870288	1.026	68
18289	Wdr36	Wdr36	chr18:32996879-33026074	3.076	147
13775	Wdr35	Wdr35	chr12:8980807-9035652	2.143	136
1370	Wdr34	Wdr34	chr2:29887078-29904399	1.439	37.73
18277	Wdr33	Wdr33	chr18:31986939-32066649	1.892	110
4129	Wdr31	Wdr31	chr4:62114768-62131906	0.5182	10
3454	Wdr3	Wdr3	chr3:99942103-99966312	2.816	140
17252	Wdr27	Wdr27	chr17:14955679-15080129	0	0
1052	Wdr26	Wdr26	chr1:183103357-183141514	1.256	118
14259	Wdr25	Wdr25	chr12:110132482-110266660	0.2069	8
17452	Wdr24	Wdr24	chr17:25960661-25965669	2.766	121
13952	Wdr20b	Wdr20b	chr12:66326504-66329441	0	0
14273	Wdr20a	Wdr20a	chr12:111976159-112033238	2.49	88
5354	Wdr19	Wdr19	chr5:65590935-65651654	0.5146	33
11697	Wdr18	Wdr18	chr10:79422897-79431991	6.788	292
9423	Wdr17	Wdr17	chr8:55714996-55804032	0	0
12698	Wdr16	Wdr16	chr11:67738308-67779144	0	0
19404	Wdr13	Wdr13	chrX:7700460-7709564	2.089	115
267	Wdr12	Wdr12	chr1:60133712-60154722	3.481	147
5297	Wdr1	Wdr1	chr5:38918052-38952834	75.85	3179
15333	Wdhd1	Wdhd1	chr14:47860619-47896465	1.003	60
15257	Wdfy4	Wdfy4	chr14:33772734-33998252	0.6384	90
5572	Wdfy3	Wdfy3	chr5:102264604-102498940	0.08255	14
15575	Wdfy2	Wdfy2	chr14:63456527-63575723	0.1024	3
398	Wdfy1	Wdfy1	chr1:79698837-79758344	2.565	170
5926	Wbscr28	Wbscr28	chr5:135377464-135382603	0	0
5928	Wbscr27	Wbscr27	chr5:135408243-135418507	1.837	75
5931	Wbscr25	Wbscr25	chr5:135463303-135477220	0	0
5935	Wbscr22	Wbscr22	chr5:135528827-135539980	9.817	187
5911	Wbscr17	Wbscr17	chr5:131350821-131783392	0	0
5914	Wbscr16	Wbscr16	chr5:134623928-134652637	0.08918	3
7831	Wbp7	Wbp7	chr7:31353874-31373745	0.1056	13
20010	Wbp5	Wbp5	chrX:132779619-132781678	202.4	3001
15718	Wbp4	Wbp4	chr14:79859744-79881075	2.506	126
16236	Wbp2nl	Wbp2nl	chr15:82129414-82144988	0	0
13606	Wbp2	Wbp2	chr11:115939887-115948278	22.61	591
7208	Wbp11	Wbp11	chr6:136762177-136776649	5.348	205
6680	Wbp1	Wbp1	chr6:83069038-83071455	9.091	161
6265	Wasl	Wasl	chr6:24563807-24614971	0.7484	47
6142	Wasf3	Wasf3	chr5:147196582-147282701	0.07672	3
4657	Wasf2	Wasf2	chr4:132686548-132754245	0.6719	40
11416	Wasf1	Wasf1	chr10:40603340-40658375	0.1077	4
19402	Was	Was	chrX:7658592-7667578	0.6669	19.96
3451	Wars2	Wars2	chr3:98945013-99024126	0.4842	30.94
14258	Wars	Wars	chr12:110098244-110131407	8.884	236
15281	Wapal	Wapal	chr14:35487114-35559403	0.629	42
12244	Wap	Wap	chr11:6535486-6538652	0	0
18199	Wac	Wac	chr18:7868856-7929025	0.8614	63
7068	Vwf	Vwf	chr6:125502981-125636695	0.1402	18
6226	Vwde	Vwde	chr6:13135610-13174965	0	0
18903	Vwce	Vwce	chr19:10708723-10739700	0	0
12255	Vwc2	Vwc2	chr11:11014019-11163529	0	0
16737	Vwa5b2	Vwa5b2	chr16:20589655-20598540	0	0
4767	Vwa5b1	Vwa5b1	chr4:138124885-138179907	0	0
10380	Vwa5a	Vwa5a	chr9:38525853-38550922	12.83	777
8755	Vwa3a	Vwa3a	chr7:127883071-127949054	0	0
19321	Vwa2	Vwa2	chr19:56948906-56986568	0	0
5009	Vwa1	Vwa1	chr4:155142604-155148670	0.04374	2
12982	Vtn	Vtn	chr11:78312622-78315827	0.3542	9
14038	Vti1b	Vti1b	chr12:80257005-80273445	1.663	31
19310	Vti1a	Vti1a	chr19:55390841-55701051	0.363	18
3458	Vtcn1	Vtcn1	chr3:100629432-100699596	0	0
11283	Vta1	Vta1	chr10:14375139-14425295	18.14	350
14093	Vsx2	Vsx2	chr12:85910802-85936407	0	0
2448	Vsx1	Vsx1	chr2:150506440-150514873	0	0
2594	Vstm2l	Vstm2l	chr2:157740389-157770455	0	0
7909	Vstm2b	Vstm2b	chr7:48154648-48185338	0	0
12263	Vstm2a	Vstm2a	chr11:16157775-16184189	0.1708	8
13784	Vsnl1	Vsnl1	chr12:11332053-11443455	0	0
967	Vsig8	Vsig8	chr1:174486069-174493847	0	0
19834	Vsig4	Vsig4	chrX:93442542-93488777	0	0
10329	Vsig2	Vsig2	chr9:37346840-37351790	0	0
20048	Vsig1	Vsig1	chrX:137442159-137473497	0	0
7991	Vrk3	Vrk3	chr7:52003999-52032884	6.31	161
12308	Vrk2	Vrk2	chr11:26371402-26493920	2.215	61
14245	Vrk1	Vrk1	chr12:107248473-107315620	1.837	98
16750	Vps8	Vps8	chr16:21423191-21644753	1.351	99
3354	Vps72	Vps72	chr3:94914964-94926973	4.017	84
12284	Vps54	Vps54	chr11:21138892-21221136	0.3206	22
12928	Vps53	Vps53	chr11:75859728-75993132	4.243	174
17625	Vps52	Vps52	chr17:34092827-34103433	5.362	216
563	Vps4b	Vps4b	chr1:108667365-108693302	1.133	54
9867	Vps4a	Vps4a	chr8:109555226-109569656	0.9597	29
3390	Vps45	Vps45	chr3:95803756-95862378	2.72	104
14405	Vps41	Vps41	chr13:18809168-18958670	16.19	750
2188	Vps39	Vps39	chr2:120142202-120178869	2.641	167
5937	Vps37d	Vps37d	chr5:135548771-135554136	0.05331	1
18905	Vps37c	Vps37c	chr19:10763305-10788909	1.365	48
5847	Vps37b	Vps37b	chr5:124454650-124482269	0.08201	3
9361	Vps37a	Vps37a	chr8:41597137-41636488	0.2476	23
9259	Vps36	Vps36	chr8:23303332-23329069	14.89	277
9685	Vps35	Vps35	chr8:87784291-87823396	44.96	2075
8224	Vps33b	Vps33b	chr7:87414541-87436465	0.8289	31
5837	Vps33a	Vps33a	chr5:123978771-124023024	5.715	342
5812	Vps29	Vps29	chr5:122804422-122813296	120.4	1709
16098	Vps28	Vps28	chr15:76452518-76456457	84.8	1093
10274	Vps26b	Vps26b	chr9:26812088-26837679	0.4387	43.9
11530	Vps26a	Vps26a	chr10:61917591-61949553	23.45	1035
13383	Vps25	Vps25	chr11:101115057-101120860	21.75	338
6624	Vps24	Vps24	chr6:71493848-71531568	19.31	729
2165	Vps18	Vps18	chr2:119114478-119124189	2.202	130
2323	Vps16	Vps16	chr2:130250056-130270005	5.333	249
4872	Vps13d	Vps13d	chr4:144565040-144780495	0.2415	46
10748	Vps13c	Vps13c	chr9:67688203-67843441	0.1609	27
15898	Vps13b	Vps13b	chr15:35301301-35860984	0.1489	29
19020	Vps13a	Vps13a	chr19:16691164-16855417	0.1464	21
10473	Vps11	Vps11	chr9:44156188-44169753	8.594	398
11600	Vpreb3	Vpreb3	chr10:75411057-75412391	0	0
16692	Vpreb2	Vpreb2	chr16:17980658-17981173	0	0
16656	Vpreb1	Vpreb1	chr16:16868496-16869343	0.09011	0.9987
10993	Vprbp	Vprbp	chr9:106724307-106782760	0.269	18.92
11327	Vnn3	Vnn3	chr10:23571278-23589647	0	0
11328	Vnn1	Vnn1	chr10:23614494-23625149	0.05684	2
12799	Vmo1	Vmo1	chr11:70327018-70328118	0	0
4875	Vmn2r-ps14	Vmn2r-ps14	chr4:145054113-145057864	0	0
3069	Vmn2r-ps11	Vmn2r-ps11	chr3:64436785-64648665	0	0
17285	Vmn2r99	Vmn2r99	chr17:18414381-19531554	0	0
17290	Vmn2r98	Vmn2r98	chr17:19190457-19218275	0	0
17289	Vmn2r97	Vmn2r97	chr17:19051286-19085035	0	0
17288	Vmn2r96	Vmn2r96	chr17:18718691-18735121	0	0
17287	Vmn2r95	Vmn2r95	chr17:18561068-18589288	0	0
17284	Vmn2r94	Vmn2r94	chr17:18380534-18414530	0	0
17286	Vmn2r93	Vmn2r93	chr17:18435245-18463405	0	0
17283	Vmn2r92	Vmn2r92	chr17:18288894-18322142	0	0
17282	Vmn2r91	Vmn2r91	chr17:18222021-18273607	0	0
17275	Vmn2r90	Vmn2r90	chr17:17840905-17871131	0	0
5637	Vmn2r9	Vmn2r9	chr5:109271966-109281529	0	0
15405	Vmn2r89	Vmn2r89	chr14:52071637-52080968	0	0
15404	Vmn2r88	Vmn2r88	chr14:52030676-52038557	0	0
12165	Vmn2r87	Vmn2r87	chr10:129908877-129934435	0	0
12164	Vmn2r86	Vmn2r86	chr10:129883255-129892950	0	0
12163	Vmn2r85	Vmn2r85	chr10:129855317-129866668	0	0
12162	Vmn2r84	Vmn2r84	chr10:129822856-129831297	0	0
11668	Vmn2r83	Vmn2r83	chr10:78931703-78954899	0	0
11667	Vmn2r82	Vmn2r82	chr10:78819336-78859511	0	0
11666	Vmn2r81	Vmn2r81	chr10:78710522-78757280	0	0
11665	Vmn2r80	Vmn2r80	chr10:78611561-78657678	0	0
5636	Vmn2r8	Vmn2r8	chr5:109226212-109237773	0	0
8303	Vmn2r79	Vmn2r79	chr7:94144975-94186478	0.02686	1
8302	Vmn2r78	Vmn2r78	chr7:94063859-94103687	0	0
8301	Vmn2r77	Vmn2r77	chr7:93943651-93960542	0	0
8284	Vmn2r76	Vmn2r76	chr7:93373716-93394711	0	0
8283	Vmn2r75	Vmn2r75	chr7:93296552-93320234	0	0
8282	Vmn2r74	Vmn2r74	chr7:93100377-93109992	0	0
8281	Vmn2r73	Vmn2r73	chr7:93006057-93024448	0.1074	3.998
8280	Vmn2r72	Vmn2r72	chr7:92886294-92903491	0	0
8279	Vmn2r71	Vmn2r71	chr7:92763972-92773057	0	0
8278	Vmn2r70	Vmn2r70	chr7:92707213-92717598	0	0
3070	Vmn2r7	Vmn2r7	chr3:64494582-64523524	0	0
8277	Vmn2r69	Vmn2r69	chr7:92554886-92564186	0	0
8276	Vmn2r68	Vmn2r68	chr7:92370028-92386214	0	0
8275	Vmn2r67	Vmn2r67	chr7:92284750-92304412	0	0
8274	Vmn2r66	Vmn2r66	chr7:92143155-92160530	0	0
8273	Vmn2r65	Vmn2r65	chr7:92088679-92112519	0	0
7927	Vmn2r63	Vmn2r63	chr7:50158621-50189159	0	0
7926	Vmn2r62	Vmn2r62	chr7:50019808-50048866	0	0
7922	Vmn2r61	Vmn2r61	chr7:49515423-49556125	0	0
7921	Vmn2r60	Vmn2r60	chr7:49371841-49451146	0	0
3068	Vmn2r6	Vmn2r6	chr3:64341483-64363740	0	0
7919	Vmn2r59	Vmn2r59	chr7:49267162-49314351	0	0
7918	Vmn2r58	Vmn2r58	chr7:49092251-49128040	0	0
7914	Vmn2r57	Vmn2r57	chr7:48655102-48704011	0	0
7457	Vmn2r56	Vmn2r56	chr7:13279347-13318454	0	0
7456	Vmn2r55	Vmn2r55	chr7:13237055-13270340	0	0
7455	Vmn2r54	Vmn2r54	chr7:13200582-13221483	0	0
7454	Vmn2r53	Vmn2r53	chr7:13166819-13191893	0	0
7427	Vmn2r52	Vmn2r52	chr7:10744001-10761635	0	0
7426	Vmn2r51	Vmn2r51	chr7:10672547-10691008	0	0
7425	Vmn2r50	Vmn2r50	chr7:10622584-10638527	0	0
3067	Vmn2r5	Vmn2r5	chr3:64294743-64311607	0	0
7424	Vmn2r49	Vmn2r49	chr7:10561594-10577488	0	0
7423	Vmn2r48	Vmn2r48	chr7:10512973-10538934	0	0
7412	Vmn2r47	Vmn2r47	chr7:8246255-8270798	0	0
7413	Vmn2r46	Vmn2r46	chr7:8317009-8332944	0	0
7418	Vmn2r45	Vmn2r45	chr7:9638311-9655801	0	0
7419	Vmn2r44	Vmn2r44	chr7:9744080-9759858	0	0
7420	Vmn2r43	Vmn2r43	chr7:9866727-9882971	0	0
7421	Vmn2r42	Vmn2r42	chr7:9927007-9944061	0	0
7422	Vmn2r41	Vmn2r41	chr7:9965779-9989425	0	0
7417	Vmn2r40	Vmn2r40	chr7:9246439-9270107	0	0
3066	Vmn2r4	Vmn2r4	chr3:64192543-64213979	0	0
7416	Vmn2r39	Vmn2r39	chr7:9147159-9163091	0	0
7415	Vmn2r38	Vmn2r38	chr7:9080032-9103001	0	0
7414	Vmn2r37	Vmn2r37	chr7:8954257-8972357	0	0
7411	Vmn2r36	Vmn2r36	chr7:7829364-7855173	0	0
7410	Vmn2r35	Vmn2r35	chr7:7738862-7772578	0	0
7409	Vmn2r34	Vmn2r34	chr7:7624540-7642109	0	0
7408	Vmn2r33	Vmn2r33	chr7:7503678-7549144	0	0
7407	Vmn2r32	Vmn2r32	chr7:7416680-7432684	0	0
7406	Vmn2r31	Vmn2r31	chr7:7336696-7352338	0	0
7405	Vmn2r30	Vmn2r30	chr7:7264985-7290204	0	0
3065	Vmn2r3	Vmn2r3	chr3:64062883-64091339	0	0
7403	Vmn2r29	Vmn2r29	chr7:7165707-7231000	0.1288	3
7372	Vmn2r28	Vmn2r28	chr7:5432058-5445453	0	0
7017	Vmn2r27	Vmn2r27	chr6:124141614-124181802	0	0
7016	Vmn2r26	Vmn2r26	chr6:123974776-124012053	0	0
7015	Vmn2r25	Vmn2r25	chr6:123772832-123803208	0	0
7014	Vmn2r24	Vmn2r24	chr6:123728989-123766298	0	0
7013	Vmn2r23	Vmn2r23	chr6:123652839-123692257	0	0
7012	Vmn2r22	Vmn2r22	chr6:123559776-123600653	0	0
7011	Vmn2r21	Vmn2r21	chr6:123442526-123483424	0	0
7010	Vmn2r20	Vmn2r20	chr6:123335280-123368079	0	0
3064	Vmn2r2	Vmn2r2	chr3:63920354-63941402	0	0
7009	Vmn2r19	Vmn2r19	chr6:123258351-123286555	0	0
6185	Vmn2r18	Vmn2r18	chr5:152364236-152389499	0	0
5645	Vmn2r17	Vmn2r17	chr5:109849032-109882406	0	0
5644	Vmn2r16	Vmn2r16	chr5:109759400-109793500	0	0
5643	Vmn2r15	Vmn2r15	chr5:109715288-109726575	0	0
5642	Vmn2r14	Vmn2r14	chr5:109644521-109653641	0	0
5641	Vmn2r13	Vmn2r13	chr5:109585087-109621126	0	0
19957	Vmn2r121	Vmn2r121	chrX:121240948-121249519	0	0
18033	Vmn2r120	Vmn2r120	chr17:57648206-57684737	0	0
5640	Vmn2r12	Vmn2r12	chr5:109514868-109526883	0	0
17969	Vmn2r118	Vmn2r118	chr17:55731639-55763970	0	0
17341	Vmn2r117	Vmn2r117	chr17:23596642-23616564	0	0
17340	Vmn2r116	Vmn2r116	chr17:23521770-23538831	0	0
17339	Vmn2r115	Vmn2r115	chr17:23480944-23497095	0	0
17338	Vmn2r114	Vmn2r114	chr17:23427901-23449280	0	0
17336	Vmn2r113	Vmn2r113	chr17:23080151-23095781	0	0
17334	Vmn2r112	Vmn2r112	chr17:22738115-22756100	0	0
17333	Vmn2r111	Vmn2r111	chr17:22684908-22710240	0	0
17303	Vmn2r110	Vmn2r110	chr17:20710793-20733223	0	0
5639	Vmn2r11	Vmn2r11	chr5:109475892-109488471	0	0
17302	Vmn2r109	Vmn2r109	chr17:20677481-20701720	0	0
17300	Vmn2r108	Vmn2r108	chr17:20599337-20618200	0	0
17299	Vmn2r107	Vmn2r107	chr17:20482389-20512736	0	0
17298	Vmn2r106	Vmn2r106	chr17:20404511-20422394	0	0
17297	Vmn2r105	Vmn2r105	chr17:20345194-20371836	0	0
17295	Vmn2r104	Vmn2r104	chr17:20166389-20185169	0	0
17294	Vmn2r103	Vmn2r103	chr17:19910327-19949500	0	0
17293	Vmn2r102	Vmn2r102	chr17:19797363-19831712	0	0
17292	Vmn2r101	Vmn2r101	chr17:19714195-19749281	0	0
17291	Vmn2r100	Vmn2r100	chr17:19641775-19669024	0	0
5638	Vmn2r10	Vmn2r10	chr5:109424558-109435455	0	0
3063	Vmn2r1	Vmn2r1	chr3:63885564-63909380	0	0
19063	Vldlr	Vldlr	chr19:27291510-27328721	0.1336	16
5900	Vkorc1l1	Vkorc1l1	chr5:130417983-130458760	0.2054	3
8876	Vkorc1	Vkorc1	chr7:135036577-135039131	76.28	831
18102	Vit	Vit	chr17:78907480-79026738	0.1304	5
14327	Vipr2	Vipr2	chr12:117316196-117384734	0	0
11189	Vipr1	Vipr1	chr9:121551834-121582072	0	0
11238	Vip	Vip	chr10:4698927-4707323	0	0
1183	Vim	Vim	chr2:13495938-13504453	322.8	8621
11153	Vill	Vill	chr9:118961920-118980444	0.2251	8
345	Vil1	Vil1	chr1:74455958-74482134	0	0
6897	Vhl	Vhl	chr6:113574015-113581627	0.3773	15
6907	Vgll4	Vgll4	chr6:114812108-114871770	8.284	156
17040	Vgll3	Vgll3	chr16:65815878-65863311	1.546	75
11459	Vgll2	Vgll2	chr10:51742492-51748277	0	0
19650	Vgll1	Vgll1	chrX:54341283-54358623	0	0
5980	Vgf	Vgf	chr5:137506165-137509221	0.0269	1
11880	Vezt	Vezt	chr10:93430845-93498493	1.364	89
13119	Vezf1	Vezf1	chr11:87881843-87898231	0.6074	39.99
3077	Veph1	Veph1	chr3:65858750-65940360	0.02133	1
9419	Vegfc	Vegfc	chr8:55162886-55271808	0.07301	2
18820	Vegfb	Vegfb	chr19:7056962-7062093	1.224	22
17879	Vegfa	Vegfa	chr17:46153943-46162112	0.5731	22
16375	Vdr	Vdr	chr15:97684858-97738727	2.208	140
9266	Vdac3	Vdac3	chr8:23687573-23704230	91.64	1787
15171	Vdac2	Vdac2	chr14:22650783-22665101	66.77	1616
12494	Vdac1	Vdac1	chr11:52174617-52202898	99.62	2562
18	Vcpip1	Vcpip1	chr1:9713278-9738463	0.3185	24
3960	Vcp	Vcp	chr4:42992836-43013379	17.36	838
15164	Vcl	Vcl	chr14:21748655-21852895	13.88	1057
14934	Vcan	Vcan	chr13:89794916-89882117	1.727	109
3594	Vcam1	Vcam1	chr3:115812938-115832606	21.54	1066
19772	Vbp1	Vbp1	chrX:72759636-72780285	15.65	365
6694	Vax2os2	Vax2os2	chr6:83642800-83662195	0	0
6695	Vax2os1	Vax2os1	chr6:83652120-83660926	0	0
6696	Vax2	Vax2	chr6:83661258-83688298	0.1671	3
19336	Vax1	Vax1	chr19:59240677-59244519	0	0
3576	Vav3	Vav3	chr3:109376925-109488612	0.2953	13
1334	Vav2	Vav2	chr2:27119155-27282345	0.2958	15
18031	Vav1	Vav1	chr17:57418523-57468659	5.239	318
18351	Vaultrc5	Vaultrc5	chr18:36961417-36961760	0.1996	1
9936	Vat1l	Vat1l	chr8:116729540-116897970	0	0
13398	Vat1	Vat1	chr11:101320062-101327513	2.915	116
7574	Vasp	Vasp	chr7:19842279-19857203	0.8846	29
16569	Vasn	Vasn	chr16:4639945-4651166	2.282	106
1093	Vash2	Vash2	chr1:192771527-192803175	0.3526	20
14123	Vash1	Vash1	chr12:88019650-88036630	0.07768	7
17732	Vars2	Vars2	chr17:35792580-35804537	0.1242	8
17686	Vars	Vars	chr17:35137852-35153274	0.13	8
2765	Vapb	Vapb	chr2:173563072-173609837	0.1675	17
18043	Vapa	Vapa	chr17:65929395-65962881	7.808	185
949	Vangl2	Vangl2	chr1:173934502-173957399	0.2126	6.999
3470	Vangl1	Vangl1	chr3:101962119-102008531	0.3746	10
6639	Vamp8	Vamp8	chr6:72335215-72340661	120.3	1377
6638	Vamp5	Vamp5	chr6:72318128-72330462	3.251	74
845	Vamp4	Vamp4	chr1:164500959-164529209	0.7051	26
4944	Vamp3	Vamp3	chr4:150421414-150432062	20.62	635
12720	Vamp2	Vamp2	chr11:68902030-68905883	0.2221	7
7058	Vamp1	Vamp1	chr6:125165599-125172324	0.1252	5
9900	Vac14	Vac14	chr8:113142538-113244299	0.5437	24
7432	V1rl1	V1rl1	chr7:11218936-11219832	0	0
7473	V1rk1	V1rk1	chr7:13716820-13717707	0	0
7472	V1rj3	V1rj3	chr7:13669638-13670564	0	0
7474	V1rj2	V1rj2	chr7:13804688-13805638	0	0
14466	V1ri9	V1ri9	chr13:22310730-22311689	0	0
14464	V1ri8	V1ri8	chr13:22236390-22237394	0	0
14474	V1ri7	V1ri7	chr13:22593206-22594114	0	0
14468	V1ri6	V1ri6	chr13:22370231-22371181	0	0
14489	V1ri5	V1ri5	chr13:23228354-23229250	0	0
14473	V1ri4	V1ri4	chr13:22566487-22567389	0	0
14470	V1ri3	V1ri3	chr13:22446215-22447117	0	0
14486	V1ri2	V1ri2	chr13:23167661-23168563	0	0
14487	V1ri10	V1ri10	chr13:23191018-23191914	0	0
14465	V1ri1	V1ri1	chr13:22279015-22279917	0	0
14479	V1rh9	V1rh9	chr13:22864268-22865194	0	0
14477	V1rh8	V1rh8	chr13:22683849-22684799	0	0
14478	V1rh7	V1rh7	chr13:22711966-22712904	0	0
14484	V1rh6	V1rh6	chr13:23103118-23104272	0	0
14485	V1rh5	V1rh5	chr13:23126207-23127310	0	0
14471	V1rh4	V1rh4	chr13:22474407-22475510	0	0
14472	V1rh3	V1rh3	chr13:22486898-22487836	0	0
14469	V1rh21	V1rh21	chr13:22419780-22420676	0	0
14482	V1rh20	V1rh20	chr13:22943468-22944364	0	0
14463	V1rh2	V1rh2	chr13:22193596-22194534	0	0
14483	V1rh18	V1rh18	chr13:22974957-22976030	0	0
14462	V1rh17	V1rh17	chr13:22179747-22180673	0	0
14492	V1rh16	V1rh16	chr13:23323984-23324910	0	0
14488	V1rh14	V1rh14	chr13:23205703-23206599	0	0
14490	V1rh13	V1rh13	chr13:23254512-23255450	0	0
14491	V1rh12	V1rh12	chr13:23275497-23276393	0	0
14475	V1rh11	V1rh11	chr13:22615920-22616855	0	0
14481	V1rh10	V1rh10	chr13:22919063-22919983	0	0
7447	V1rg9	V1rg9	chr7:12845108-12846028	0	0
7449	V1rg8	V1rg8	chr7:12906557-12907477	0	0
7445	V1rg7	V1rg7	chr7:12737813-12738753	0	0
7443	V1rg6	V1rg6	chr7:12465692-12466609	0	0
7442	V1rg5	V1rg5	chr7:12432124-12433038	0	0
7444	V1rg4	V1rg4	chr7:12515660-12516634	0	0
7446	V1rg3	V1rg3	chr7:12778314-12779240	0	0
7441	V1rg2	V1rg2	chr7:12341606-12342517	0	0
7448	V1rg12	V1rg12	chr7:12890154-12891068	0	0
7450	V1rg11	V1rg11	chr7:12947157-12948113	0	0
7440	V1rg1	V1rg1	chr7:12254948-12255868	0	0
17313	V1rf5	V1rf5	chr17:21130691-21131650	0	0
17317	V1rf4	V1rf4	chr17:21423497-21424617	0	0
17318	V1rf3	V1rf3	chr17:21450981-21451850	0	0
17316	V1rf2	V1rf2	chr17:21397391-21399827	0	0
17315	V1rf1	V1rf1	chr17:21365790-21366779	0	0
7431	V1re9	V1re9	chr7:11165105-11166836	0	0
17309	V1re8	V1re8	chr17:20983515-20984465	0	0
17310	V1re7	V1re7	chr17:21026680-21027615	0	0
17306	V1re6	V1re6	chr17:20872064-20873090	0	0
17301	V1re5	V1re5	chr17:20639263-20640159	0	0
17311	V1re4	V1re4	chr17:21050171-21051327	0	0
17307	V1re3	V1re3	chr17:20913023-20914465	0	0
17305	V1re2	V1re2	chr17:20824472-20825368	0	0
7435	V1re13	V1re13	chr7:11332851-11334887	0	0
7701	V1re12	V1re12	chr7:27396138-27397097	0	0
7428	V1re11	V1re11	chr7:10859177-10860700	0	0
7429	V1re10	V1re10	chr7:11032138-11033136	0	0
17308	V1re1	V1re1	chr17:20951459-20952379	0	0
7618	V1rd9	V1rd9	chr7:24443335-24445682	0	0
7617	V1rd7	V1rd7	chr7:24417007-24418587	0	0
7376	V1rd6	V1rd6	chr7:5959352-5962612	0.0256	1
7370	V1rd4	V1rd4	chr7:5360492-5364747	0.4355	17
7367	V1rd3	V1rd3	chr7:5146518-5148349	0	0
7619	V1rd22	V1rd22	chr7:24538930-24539871	0	0
7609	V1rd21	V1rd21	chr7:20723472-20724437	0	0
7624	V1rd20	V1rd20	chr7:24769131-24770045	0	0
7373	V1rd2	V1rd2	chr7:5626206-5628197	0	0
7626	V1rd19	V1rd19	chr7:24788130-24789047	0	0
7625	V1rd18	V1rd18	chr7:24788130-24789047	0	0
7622	V1rd17	V1rd17	chr7:24713405-24714376	0	0
7623	V1rd16	V1rd16	chr7:24737433-24738350	0.0748	1
7627	V1rd15	V1rd15	chr7:24839793-24840710	0	0
7613	V1rd14	V1rd14	chr7:23197250-23199687	0	0
7621	V1rd13	V1rd13	chr7:24678548-24679462	0	0
7620	V1rd12	V1rd12	chr7:24650539-24651468	0	0
7375	V1rd11	V1rd11	chr7:5835182-5836144	0	0
7371	V1rd10	V1rd10	chr7:5405429-5406361	0	0
7374	V1rd1	V1rd1	chr7:5753950-5757047	0	0
6574	V1rc8	V1rc8	chr6:57928388-57929296	0	0
6558	V1rc7	V1rc7	chr6:57183433-57184344	0	0
6559	V1rc6	V1rc6	chr6:57208143-57209042	0	0
6557	V1rc5	V1rc5	chr6:57159852-57160754	0	0
6576	V1rc33	V1rc33	chr6:58165100-58166011	0	0
6552	V1rc32	V1rc32	chr6:56985907-56987119	0	0
6553	V1rc30	V1rc30	chr6:57020936-57021835	0	0
6555	V1rc3	V1rc3	chr6:57087347-57088246	0	0
6560	V1rc29	V1rc29	chr6:57272718-57273629	0	0
6570	V1rc28	V1rc28	chr6:57793558-57794451	0	0
6563	V1rc27	V1rc27	chr6:57354458-57355384	0	0
6562	V1rc26	V1rc26	chr6:57339662-57340561	0	0
6577	V1rc25	V1rc25	chr6:58215168-58216076	0	0
6572	V1rc24	V1rc24	chr6:57875877-57876785	0	0
6571	V1rc23	V1rc23	chr6:57850076-57850984	0	0
6579	V1rc22	V1rc22	chr6:58384931-58385839	0	0
6549	V1rc21	V1rc21	chr6:56906507-56907400	0	0
6551	V1rc20	V1rc20	chr6:56952349-56953260	0	0
6578	V1rc2	V1rc2	chr6:58257291-58258202	0	0
6550	V1rc19	V1rc19	chr6:56935336-56936283	0	0
6573	V1rc18	V1rc18	chr6:57905635-57906525	0	0
6575	V1rc17	V1rc17	chr6:57958177-57959196	0	0
6561	V1rc16	V1rc16	chr6:57310461-57311372	0	0
6598	V1rc15	V1rc15	chr6:66502177-66509702	0	0
6599	V1rc14	V1rc14	chr6:66561645-66562562	0	0
6603	V1rc13	V1rc13	chr6:66726216-66727124	0	0
6600	V1rc12	V1rc12	chr6:66628788-66629678	0	0
6601	V1rc11	V1rc11	chr6:66665966-66666883	0	0
6602	V1rc10	V1rc10	chr6:66681386-66682294	0	0
6554	V1rc1	V1rc1	chr6:57063419-57064354	0	0
6783	V1rb9	V1rb9	chr6:89696476-89697408	0	0
6788	V1rb8	V1rb8	chr6:89926165-89927094	0	0
6781	V1rb7	V1rb7	chr6:89664197-89665129	0	0
6786	V1rb4	V1rb4	chr6:89843268-89844200	0	0
6796	V1rb3	V1rb3	chr6:90173402-90174334	0	0
6791	V1rb2	V1rb2	chr6:90022080-90023012	0	0
6782	V1rb10	V1rb10	chr6:89696418-89697408	0	0
6792	V1rb1	V1rb1	chr6:90057269-90058201	0	0
6797	V1ra9	V1ra9	chr6:90219100-90220047	0	0
6795	V1ra8	V1ra8	chr6:90152811-90153650	0	0
6794	V1ra7	V1ra7	chr6:90128710-90129639	0	0
6784	V1ra6	V1ra6	chr6:89794590-89795531	0	0
6785	V1ra5	V1ra5	chr6:89819507-89820448	0	0
6789	V1ra4	V1ra4	chr6:89971882-89972814	0	0
6790	V1ra3	V1ra3	chr6:89985927-89986835	0	0
6787	V1ra2	V1ra2	chr6:89881644-89890501	0	0
6793	V1ra1	V1ra1	chr6:90072637-90080639	0	0
19483	Uxt	Uxt	chrX:20528791-20539104	5.688	69
182	Uxs1	Uxs1	chr1:43807076-43884553	3.969	73
8357	Uvrag	Uvrag	chr7:106035253-106289654	0.1997	10
20200	Uty	Uty	chrY:433587-582181	0.09194	7
13729	Uts2r	Uts2r	chr11:121021585-121023287	0	0
16789	Uts2d	Uts2d	chr16:27353408-27370325	0	0
4942	Uts2	Uts2	chr4:150371206-150375918	0	0
11270	Utrn	Utrn	chr10:12101986-12581533	0.7043	127
13002	Utp6	Utp6	chr11:79747458-79775889	2.271	128
5482	Utp3	Utp3	chr5:88983508-88985108	9.907	231
15944	Utp23	Utp23	chr15:51709056-51716160	2.007	82.99
11853	Utp20	Utp20	chr10:88209353-88289559	0.6843	88
13143	Utp18	Utp18	chr11:93720557-93747080	0.3679	14
14990	Utp15	Utp15	chr13:99016800-99032947	1.079	64
394	Utp14b	Utp14b	chr1:78654400-78664175	0.03717	2
19595	Utp14a	Utp14a	chrX:45610111-45635626	2.09	73.99
4522	Utp11l	Utp11l	chr4:124356008-124370798	16	222
8966	Utf1	Utf1	chr7:147129755-147131011	0	0
11260	Ust	Ust	chr10:7924551-8238623	0.2244	14
6168	Uspl1	Uspl1	chr5:149996136-150027010	3.224	145
20202	Usp9y	Usp9y	chrY:635404-796225	0	0
19449	Usp9x	Usp9x	chrX:12648624-12750453	0.7731	134
2266	Usp8	Usp8	chr2:126533099-126585028	5.933	356
16596	Usp7	Usp7	chr16:8688815-8738435	0.5567	44
1158	Usp6nl	Usp6nl	chr2:6273782-6364866	0.162	11
15154	Usp54	Usp54	chr14:21368134-21437576	0.2854	27
3629	Usp53	Usp53	chr3:122636519-122687365	0.1882	11
12070	Usp52	Usp52	chr10:127740391-127758403	0.5878	38
20106	Usp51	Usp51	chrX:149441012-149444000	0	0
2267	Usp50	Usp50	chr2:126587158-126609180	0	0
7037	Usp5	Usp5	chr6:124765037-124779465	37.97	1756
17927	Usp49	Usp49	chr17:47767639-47821016	0.06152	5
4753	Usp48	Usp48	chr4:137150104-137214452	0.7887	66
8689	Usp47	Usp47	chr7:119167020-119254894	0.8437	68
5407	Usp46	Usp46	chr5:74396062-74464436	1.576	74
3865	Usp45	Usp45	chr4:21703417-21765019	0.4458	39
11878	Usp44	Usp44	chr10:93294300-93311283	0	0
12697	Usp43	Usp43	chr11:67668025-67735655	0.04466	2.902
6101	Usp42	Usp42	chr5:144471195-144493149	0.3733	28
462	Usp40	Usp40	chr1:89841696-89905126	1.442	106
11043	Usp4	Usp4	chr9:108250162-108294860	7.319	391
6634	Usp39	Usp39	chr6:72268670-72295169	1.228	40
9614	Usp38	Usp38	chr8:83504632-83538805	0.3078	21
346	Usp37	Usp37	chr1:74485686-74590860	0.2102	11
13655	Usp36	Usp36	chr11:118120968-118151558	0.4163	34
3768	Usp33	Usp33	chr3:152009445-152056578	0.4306	26
13077	Usp32	Usp32	chr11:84797990-84953457	0.5454	55
8763	Usp31	Usp31	chr7:128785536-128850767	0.1481	22
5699	Usp30	Usp30	chr5:114550342-114572933	0.2707	11
10737	Usp3	Usp3	chr9:66365688-66440787	1.279	41
7398	Usp29	Usp29	chr7:6683452-6919931	0	0
10532	Usp28	Usp28	chr9:48793490-48850622	0.358	22
19373	Usp27x	Usp27x	chrX:6949719-6953400	0	0
19618	Usp26	Usp26	chrX:49107136-49150930	0	0
17051	Usp25	Usp25	chr16:77014314-77117025	0.7469	48
12638	Usp22	Usp22	chr11:60965444-60988561	1.716	107
930	Usp21	Usp21	chr1:173212086-173218092	1.166	37
1399	Usp20	Usp20	chr2:30851564-30879104	1.644	119
10458	Usp2	Usp2	chr9:43875104-43903710	1.918	108
11050	Usp19	Usp19	chr9:108393079-108404030	0.547	37
6976	Usp18	Usp18	chr6:121195924-121220935	7.522	194
17071	Usp16	Usp16	chr16:87455230-87483756	1.813	77
12006	Usp15	Usp15	chr10:122550300-122633979	8.458	396
18206	Usp14	Usp14	chr18:9993613-10030147	12.58	767
2942	Usp13	Usp13	chr3:32716548-32834179	0.02931	2
6145	Usp12	Usp12	chr5:147546388-147606532	0.5462	34
19477	Usp11	Usp11	chrX:20281035-20297665	0.9118	46
9972	Usp10	Usp10	chr8:122434752-122481457	4.541	214
4256	Usp1	Usp1	chr4:98590501-98602224	0.4612	23.96
5514	Uso1	Uso1	chr5:92566964-92631821	1.48	84
19278	Usmg5	Usmg5	chr19:47157961-47165115	305.3	1516
9542	Ushbp1	Ushbp1	chr8:73908173-73919700	0	0
1084	Ush2a	Ush2a	chr1:190086717-190788918	0	0
13574	Ush1g	Ush1g	chr11:115176506-115183232	0	0
8081	Ush1c	Ush1c	chr7:53450721-53493860	0	0
7853	Usf2	Usf2	chr7:31730269-31741822	0.5114	18
938	Usf1	Usf1	chr1:173341812-173348873	6.673	177
9539	Use1	Use1	chr8:73891116-73893631	26.21	326
8935	Uros	Uros	chr7:140878013-140900978	1.555	41
4410	Urod	Urod	chr4:116662822-116666980	10.19	178
6800	Uroc1	Uroc1	chr6:90283283-90314542	0	0
1365	Urm1	Urm1	chr2:29682909-29700516	0.9273	28.94
10044	Urb2	Urb2	chr8:126547373-126572404	0.5233	44
12501	Uqcrq	Uqcrq	chr11:53242450-53244333	337.8	2455
4387	Uqcrh	Uqcrh	chr4:115739570-115747675	294.3	2340
14579	Uqcrfs1	Uqcrfs1	chr13:30632181-30637185	1.36	26
8753	Uqcrc2	Uqcrc2	chr7:127778703-127803037	23.93	656
11066	Uqcrc1	Uqcrc1	chr9:108838661-108851686	61.24	1477
14840	Uqcrb	Uqcrb	chr13:67001557-67006286	316.2	2316
11726	Uqcr	Uqcr	chr10:79865742-79869566	514	3264
2558	Uqcc	Uqcc	chr2:155672631-155756042	2.638	102
19901	Uprt	Uprt	chrX:101678121-101701601	0.5557	9
1566	Upp2	Upp2	chr2:58607596-58643079	0	0
12253	Upp1	Upp1	chr11:9018106-9036172	0.4284	7.999
5961	Upk3b	Upk3b	chr5:136514366-136520863	0	0
16283	Upk3a	Upk3a	chr15:84847571-84852990	0	0
10480	Upk2	Upk2	chr9:44260798-44262850	0	0
16907	Upk1b	Upk1b	chr16:38773297-38800316	0	0
7833	Upk1a	Upk1a	chr7:31388111-31397493	0.1599	2.997
19534	Upf3b	Upf3b	chrX:34631829-34650317	2.165	69
9190	Upf3a	Upf3a	chr8:13785615-13798537	0.2941	6
1155	Upf2	Upf2	chr2:5872515-5977749	0.8361	63
9504	Upf1	Upf1	chr8:72855421-72877172	0.3296	22
11582	Upb1	Upb1	chr10:74869779-74902940	0	0
3754	Uox	Uox	chr3:146260113-146294447	0.03646	0.9786
17426	Unkl	Unkl	chr17:25359527-25371387	0.3003	14.93
13604	Unk	Unk	chr11:115891636-115922508	0.1294	7
5701	Ung	Ung	chr5:114581165-114589330	0.1081	3
6051	Uncx	Uncx	chr5:140019852-140024132	0	0
18680	Unc93b1	Unc93b1	chr19:3935186-3949339	35.77	1180
17244	Unc93a	Unc93a	chr17:13301483-13324657	0	0
16184	Unc84b	Unc84b	chr15:79554500-79572960	0.2965	16
6040	Unc84a	Unc84a	chr5:139676624-139725749	4.114	243
305	Unc80	Unc80	chr1:66515021-66745720	0	0
14196	Unc79	Unc79	chr12:104240099-104422208	0	0
9323	Unc5d	Unc5d	chr8:29757189-30330108	0.01489	2
17948	Unc5cl	Unc5cl	chr17:48594226-48608007	0	0
3714	Unc5c	Unc5c	chr3:141128528-141497886	0.1108	15
11505	Unc5b	Unc5b	chr10:60225343-60294329	1.393	119
14735	Unc5a	Unc5a	chr13:55050793-55107379	0	0
136	Unc50	Unc50	chr1:37487017-37495969	3.988	82
13034	Unc45b	Unc45b	chr11:82724833-82756908	0	0
8227	Unc45a	Unc45a	chr7:87470180-87485105	1.979	94
13605	Unc13d	Unc13d	chr11:115923410-115939275	0.1385	8
10785	Unc13c	Unc13c	chr9:73327231-73781374	0	0
3965	Unc13b	Unc13b	chr4:43071856-43277745	0.03232	3
9557	Unc13a	Unc13a	chr8:74153322-74195546	0	0
5724	Unc119b	Unc119b	chr5:115572575-115584984	0.6409	34
12976	Unc119	Unc119	chr11:78157024-78162658	0.4824	9
16848	Umps	Umps	chr16:33955098-33967089	6.015	282
17552	Umodl1	Umodl1	chr17:31091628-31147655	0	0
8733	Umod	Umod	chr7:126606381-126622769	0	0
11185	Ulk4	Ulk4	chr9:120873574-121186290	0.2358	14
10633	Ulk3	Ulk3	chr9:57437259-57444039	0.3646	15
12652	Ulk2	Ulk2	chr11:61589100-61668594	0.756	64
5665	Ulk1	Ulk1	chr5:111213508-111239100	0.6475	49
14737	Uimc1	Uimc1	chr13:55129241-55201656	1.968	84
19089	Uhrf2	Uhrf2	chr19:30105003-30168214	0.9898	51
11861	Uhrf1bp1l	Uhrf1bp1l	chr10:89207771-89281145	0.9587	69
17504	Uhrf1bp1	Uhrf1bp1	chr17:27993452-28036985	0.3206	40
17996	Uhrf1	Uhrf1	chr17:56443736-56462909	8.077	403
905	Uhmk1	Uhmk1	chr1:172129387-172145524	0.2375	7
3639	Ugt8a	Ugt8a	chr3:125568261-125641468	0	0
15830	Ugt3a2	Ugt3a2	chr15:9265353-9300625	0	0
15829	Ugt3a1	Ugt3a1	chr15:9209584-9244791	0	0
5456	Ugt2b5	Ugt2b5	chr5:87553985-87569343	0	0
5459	Ugt2b38	Ugt2b38	chr5:87838965-87853213	0	0
5457	Ugt2b37	Ugt2b37	chr5:87669517-87683813	0.03654	1
5455	Ugt2b36	Ugt2b36	chr5:87494952-87521580	0	0
5454	Ugt2b35	Ugt2b35	chr5:87429885-87442299	0	0
5452	Ugt2b34	Ugt2b34	chr5:87318795-87335962	0.02253	1
5453	Ugt2b1	Ugt2b1	chr5:87345664-87355528	0	0
5458	Ugt2a3	Ugt2a3	chr5:87753997-87766220	0	0
5461	Ugt2a2	Ugt2a2	chr5:87888518-87911283	0	0
5460	Ugt2a1	Ugt2a1	chr5:87888515-87919896	0	0
464	Ugt1a9	Ugt1a9	chr1:89967354-90116577	0.06405	3
465	Ugt1a7c	Ugt1a7c	chr1:89991576-90116577	1.688	81
466	Ugt1a6b	Ugt1a6b	chr1:89999852-90115552	0.09147	3
467	Ugt1a6a	Ugt1a6a	chr1:90031384-90116577	0.2703	13
468	Ugt1a5	Ugt1a5	chr1:90062587-90116577	0	0
469	Ugt1a2	Ugt1a2	chr1:90097186-90116577	0	0
463	Ugt1a10	Ugt1a10	chr1:89951986-90116577	0	0
471	Ugt1a1	Ugt1a1	chr1:90108534-90116577	0	0
12285	Ugp2	Ugp2	chr11:21221147-21270882	3.947	177
15772	Uggt2	Uggt2	chr14:119384207-119498656	0.2319	22
117	Uggt1	Uggt1	chr1:36196874-36301147	1.08	142
5359	Ugdh	Ugdh	chr5:65804461-65827081	48.25	1716
4099	Ugcg	Ugcg	chr4:59202422-59235705	1.588	86
9394	Ufsp2	Ufsp2	chr8:47060893-47082213	14.54	324
5985	Ufsp1	Ufsp1	chr5:137735897-137736892	0.2068	3
3009	Ufm1	Ufm1	chr3:53659131-53667729	5.341	236
16711	Ufd1l	Ufd1l	chr16:18812419-18835348	9.679	276
931	Ufc1	Ufc1	chr1:173218695-173225113	32.05	450
8098	Uevld	Uevld	chr7:54178586-54213888	0.775	52
8382	Ucp3	Ucp3	chr7:107621500-107634941	0	0
8383	Ucp2	Ucp2	chr7:107641854-107650682	33.51	2017
9620	Ucp1	Ucp1	chr8:85814247-85822355	0	0
14350	Ucn3	Ucn3	chr13:3939936-3944595	0	0
11068	Ucn2	Ucn2	chr9:108888208-108889209	0	0
5200	Ucn	Ucn	chr5:31440362-31441268	0	0
1146	Ucma	Ucma	chr2:4897168-4906791	0	0
2839	Uckl1os	Uckl1os	chr2:181314237-181316853	0.03406	1
2838	Uckl1	Uckl1	chr2:181303859-181316678	1.366	36
890	Uck2	Uck2	chr1:169156217-169215258	0.6172	12
1417	Uck1	Uck1	chr2:32110522-32115625	1.091	31
751	Uchl5	Uchl5	chr1:145624408-145654596	3.121	84
10701	Uchl4	Uchl4	chr9:64083008-64084169	0	0
15742	Uchl3	Uchl3	chr14:102053184-102095342	4.356	59
5370	Uchl1	Uchl1	chr5:67067360-67078473	11.31	189
9334	Ubxn8	Ubxn8	chr8:34730058-34752448	2.608	107
16825	Ubxn7	Ubxn7	chr16:32332338-32393832	0.1198	18
17983	Ubxn6	Ubxn6	chr17:56207677-56214412	3.431	85
619	Ubxn4	Ubxn4	chr1:130140758-130175954	1.426	84.99
3810	Ubxn2b	Ubxn2b	chr4:6118252-6146935	0.6381	44
13763	Ubxn2a	Ubxn2a	chr12:4885838-4914326	0.3554	13
4683	Ubxn11	Ubxn11	chr4:133658514-133682693	0.3083	7
4768	Ubxn10	Ubxn10	chr4:138274453-138293082	0	0
18866	Ubxn1	Ubxn1	chr19:8946049-8950146	25.99	391
10144	Ubtfl1	Ubtfl1	chr9:18208862-18215946	0	0
13424	Ubtf	Ubtf	chr11:102165874-102178601	1.56	101
12347	Ubtd2	Ubtd2	chr11:32355372-32418709	0.5435	24
19192	Ubtd1	Ubtd1	chr19:42056253-42109131	0.8994	20
14193	Ubr7	Ubr7	chr12:103996185-104015911	2.326	110
15912	Ubr5	Ubr5	chr15:37897083-38008608	1.293	184
4786	Ubr4	Ubr4	chr4:138936574-139045445	1.216	281
1622	Ubr3	Ubr3	chr2:69735303-69862070	0.3998	47
17916	Ubr2	Ubr2	chr17:47065240-47147442	0.3864	42
2198	Ubr1	Ubr1	chr2:120686012-120796451	0.6813	77
8519	Ubqlnl	Ubqlnl	chr7:111296773-111299070	0	0
3198	Ubqln4	Ubqln4	chr3:88357638-88373647	0.6516	32
8518	Ubqln3	Ubqln3	chr7:111289137-111291786	0	0
20111	Ubqln2	Ubqln2	chrX:149932775-149936101	0.2683	13
14779	Ubqln1	Ubqln1	chr13:58277523-58284687	1.502	52
11128	Ubp1	Ubp1	chr9:113840052-113886319	0.5883	33
2328	Ubox5	Ubox5	chr2:130415738-130455722	0.7083	38
6354	Ubn2	Ubn2	chr6:38383925-38462763	0.3043	65
16582	Ubn1	Ubn1	chr16:5050161-5086378	0.7234	68
12386	Ublcp1	Ublcp1	chr11:44268079-44284050	9.533	296
10642	Ubl7	Ubl7	chr9:57758793-57777775	16.02	306
10191	Ubl5	Ubl5	chr9:20447762-20451233	58.89	1663
3534	Ubl4b	Ubl4b	chr3:107356616-107357991	0	0
19754	Ubl4	Ubl4	chrX:71612740-71613866	14.9	133
6163	Ubl3	Ubl3	chr5:149316207-149364364	5.638	219
4905	Ubiad1	Ubiad1	chr4:147808606-147818860	1.11	48
8769	Ubfd1	Ubfd1	chr7:129210712-129225713	1.038	73
4920	Ube4b	Ube4b	chr4:148702525-148800740	0.9724	78
10493	Ube4a	Ube4a	chr9:44731210-44773683	1.756	155
5168	Ube3c	Ube3c	chr5:29895782-30002617	1.378	101
5705	Ube3b	Ube3b	chr5:114830616-114871175	2.077	157
8142	Ube3a	Ube3a	chr7:66484122-66562097	0.7412	53
13193	Ube2z	Ube2z	chr11:95908750-95926678	1.713	99
47	Ube2w	Ube2w	chr1:16559487-16609367	10.06	345
16644	Ube2v2	Ube2v2	chr16:15551079-15594611	4.976	427
2723	Ube2v1	Ube2v1	chr2:167433139-167457505	103.1	2927
4266	Ube2u	Ube2u	chr4:100151472-100222750	0	0
702	Ube2t	Ube2t	chr1:136859154-136870714	1.145	18
7347	Ube2s	Ube2s	chr7:4759616-4763942	0.9035	13
3927	Ube2r2	Ube2r2	chr4:41083054-41140403	4.353	210
10600	Ube2q2	Ube2q2	chr9:54997185-55055335	0.5857	25
3240	Ube2q1	Ube2q1	chr3:89577531-89587919	0.9353	41.97
13625	Ube2o	Ube2o	chr11:116399067-116442761	0.09258	7
11892	Ube2n	Ube2n	chr10:94977796-95008292	37.77	2118
7470	Ube2m	Ube2m	chr7:13620587-13623327	3.675	63
1718	Ube2l6	Ube2l6	chr2:84638985-84650158	21.02	424
16666	Ube2l3	Ube2l3	chr16:17152108-17201585	30.9	1174
5361	Ube2k	Ube2k	chr5:65928500-65990228	2.455	174
5021	Ube2j2	Ube2j2	chr4:155317940-155333713	0.1072	4.999
3889	Ube2j1	Ube2j1	chr4:33118400-33139339	1.384	71
17430	Ube2i	Ube2i	chr17:25397456-25411236	19.42	717
6301	Ube2h	Ube2h	chr6:30162965-30254345	7.219	293
11628	Ube2g2	Ube2g2	chr10:77085066-77108735	12.09	349
12845	Ube2g1	Ube2g1	chr11:72420763-72499983	0.9843	55
491	Ube2f	Ube2f	chr1:93146896-93182602	4.534	89.99
1689	Ube2e3	Ube2e3	chr2:78709204-78760740	2.677	60
15137	Ube2e2	Ube2e2	chr14:19406091-19726141	1.599	32
15136	Ube2e1	Ube2e1	chr14:19115243-19164358	1.734	35
19947	Ube2dnl	Ube2dnl	chrX:112018621-112019550	0	0
3686	Ube2d3	Ube2d3	chr3:135101723-135130142	10.96	418
18326	Ube2d2	Ube2d2	chr18:35931213-35966825	0.4954	17.91
11570	Ube2d1	Ube2d1	chr10:70717728-70748010	0.4319	9
10847	Ube2cbp	Ube2cbp	chr9:86200841-86358523	0.1127	3
2679	Ube2c	Ube2c	chr2:164595429-164598402	10.1	137
12487	Ube2b	Ube2b	chr11:51798649-51813968	26.12	808
19528	Ube2a	Ube2a	chrX:34414361-34424215	9.023	218
20196	Ube1y1	Ube1y1	chrY:155156-180667	0	0
11026	Ube1l	Ube1l	chr9:107877898-107886387	3.409	157
17789	Ubd	Ubd	chr17:37330507-37332784	0	0
5872	Ubc	Ubc	chr5:125866335-125870387	280.2	9826
12661	Ubb	Ubb	chr11:62365006-62366714	3156	53550
10445	Ubash3b	Ubash3b	chr9:40821724-40965577	0.8046	38
17557	Ubash3a	Ubash3a	chr17:31345011-31379348	0	0
3245	Ubap2l	Ubap2l	chr3:89804062-89856387	8.708	445
3928	Ubap2	Ubap2	chr4:41141348-41222168	0.2668	16.98
3930	Ubap1	Ubap1	chr4:41296029-41336799	4.812	189
15782	Ubac2	Ubac2	chr14:122277828-122420257	2.231	70
1298	Ubac1	Ubac1	chr2:25854067-25877231	1.099	29
5442	Uba6	Uba6	chr5:86539754-86601768	1.053	78
9511	Uba52	Uba52	chr8:73032165-73034266	104.6	752.8
10954	Uba5	Uba5	chr9:103948918-103965451	1.172	41
6836	Uba3	Uba3	chr6:97133810-97155636	16.05	571
7874	Uba2	Uba2	chr7:34925716-34953548	1.333	49
19475	Uba1	Uba1	chrX:20240081-20259829	21.45	1105
1263	Uap1l1	Uap1l1	chr2:25217012-25221146	4.104	101
904	Uap1	Uap1	chr1:172072134-172105077	3.038	101
10674	Uaca	Uaca	chr9:60642355-60728177	1.163	75
2525	U46068	U46068	chr2:154016554-154046079	0	0
7363	U2af2	U2af2	chr7:5013784-5031541	1.345	42
7829	U2af1l4	U2af1l4	chr7:31348359-31350383	7.947	100
17565	U2af1	U2af1	chr17:31784027-31795699	12.95	171
3780	Tyw3	Tyw3	chr3:154239484-154260059	0.4525	29
5909	Tyw1	Tyw1	chr5:130732907-130817437	2.547	113
11517	Tysnd1	Tysnd1	chr10:61158262-61165521	0.1202	4
4171	Tyrp1	Tyrp1	chr4:80480134-80497622	0	0
7816	Tyrobp	Tyrobp	chr7:31198807-31202598	1005	8280
2179	Tyro3	Tyro3	chr2:119625250-119643839	0.1891	10.98
8305	Tyr	Tyr	chr7:94575915-94641921	2.194	105.7
11840	Tyms-ps	Tyms-ps	chr10:87429416-87430762	0.1527	2.996
5171	Tyms	Tyms	chr5:30385367-30400121	8.234	375
16326	Tymp	Tymp	chr15:89202362-89207468	0	0
10209	Tyk2	Tyk2	chr9:20908512-20935719	1.572	110
6780	Txnrd3	Txnrd3	chr6:89593982-89625523	0.1937	8
16704	Txnrd2	Txnrd2	chr16:18426510-18479166	0.2884	8
11804	Txnrd1	Txnrd1	chr10:82321951-82360469	4.356	210
9884	Txnl4b	Txnl4b	chr8:112089886-112097951	0.4206	11
18641	Txnl4a	Txnl4a	chr18:80403537-80409471	14.4	353
18555	Txnl1	Txnl1	chr18:63822455-63852013	4.617	172
3410	Txnip	Txnip	chr3:96361880-96365780	11.52	470
146	Txndc9	Txndc9	chr1:38040712-38054053	7.799	522
4089	Txndc8	Txndc8	chr4:57996901-58021996	0.1091	0.9822
10923	Txndc6	Txndc6	chr9:99370840-99375170	0	0
14633	Txndc5	Txndc5	chr13:38592144-38620329	4.828	184
14410	Txndc3	Txndc3	chr13:19736948-19789629	0	0
18044	Txndc2	Txndc2	chr17:65986845-65989096	0	0
12833	Txndc17	Txndc17	chr11:72021056-72023989	74.55	1570
15315	Txndc16	Txndc16	chr14:45754123-45839069	2.421	142
14761	Txndc15	Txndc15	chr13:55816011-55827588	3.552	79
1712	Txndc14	Txndc14	chr2:84511474-84518204	27.63	792
4334	Txndc12	Txndc12	chr4:108507283-108534724	21.72	403
16616	Txndc11	Txndc11	chr16:11075004-11088023	0.2814	4.999
16130	Txn2	Txn2	chr15:77745481-77759424	84.14	1571
4088	Txn1	Txn1	chr4:57956245-57969283	119.6	1830
11286	Txlnb	Txlnb	chr10:17516025-17565469	0.1232	8
4607	Txlna	Txlna	chr4:129303327-129317884	1.848	126
5395	Txk	Txk	chr5:73087217-73127744	0	0
18048	Twsg1	Twsg1	chr17:66272406-66300470	2.221	129
13858	Twistnb	Twistnb	chr12:34114489-34124245	0.4136	14
502	Twist2	Twist2	chr1:93698054-93744604	0.05234	1
13860	Twist1	Twist1	chr12:34642536-34644696	0.4634	11
10972	Twf2	Twf2	chr9:106105439-106117718	9.563	222
16356	Twf1	Twf1	chr15:94408379-94420255	49.61	2148
18876	Tut1	Tut1	chr19:9028340-9040700	1.898	76
12938	Tusc5	Tusc5	chr11:76493375-76512162	0	0
11004	Tusc4	Tusc4	chr9:107444540-107448037	5.039	107
9355	Tusc3	Tusc3	chr8:40068921-40250468	2.269	50
11007	Tusc2	Tusc2	chr9:107465586-107468439	0.7028	17
4230	Tusc1	Tusc1	chr4:93000839-93002202	0	0
17189	Tulp4	Tulp4	chr17:6106830-6240637	3.343	431
7089	Tulp3	Tulp3	chr6:128271179-128305869	0.8141	40
8046	Tulp2	Tulp2	chr7:52769076-52777750	0.03901	1
17515	Tulp1	Tulp1	chr17:28488464-28502088	0	0
12179	Tug1	Tug1	chr11:3539797-3548811	8.081	555
3343	Tuft1	Tuft1	chr3:94416681-94462728	1.178	44
8802	Tufm	Tufm	chr7:133630869-133634244	14.52	357
16313	Tubgcp6	Tubgcp6	chr15:88929528-88953580	0.5527	56
8132	Tubgcp5	Tubgcp5	chr7:63049518-63086817	1.063	57
2207	Tubgcp4	Tubgcp4	chr2:120996942-121022854	2.036	76
9168	Tubgcp3	Tubgcp3	chr8:12614277-12672100	2.86	152
8969	Tubgcp2	Tubgcp2	chr7:147181854-147222249	3.205	144
13377	Tubg2	Tubg2	chr11:101017227-101023101	1.256	31.98
13376	Tubg1	Tubg1	chr11:100981445-100987733	13.57	317.9
11398	Tube1	Tube1	chr10:38853829-38870864	0.2579	11
13089	Tubd1	Tubd1	chr11:86358510-86380862	0.7778	21
18580	Tubb6	Tubb6	chr18:67550385-67562403	182.5	4635
17737	Tubb5	Tubb5	chr17:35970865-35975246	195	7512
18024	Tubb4	Tubb4	chr17:57219489-57227205	1.664	54
10032	Tubb3	Tubb3	chr8:125935464-125945910	12.31	309
1248	Tubb2c	Tubb2c	chr2:25077682-25080161	123.6	2762
14609	Tubb2b	Tubb2b	chr13:34218877-34222223	11.07	309.8
13786	Tubb2a-ps2	Tubb2a-ps2	chr12:11889002-11889705	0	0
14608	Tubb2a	Tubb2a	chr13:34166147-34169877	10.72	250.9
2772	Tubb1	Tubb1	chr2:174276196-174283383	0	0
14349	Tubal3	Tubal3	chr13:3923941-3934522	0	0
6975	Tuba8	Tuba8	chr6:121160788-121176115	0.7672	16
373	Tuba4a	Tuba4a	chr1:75211549-75215828	15.22	455
7262	Tuba3b	Tuba3b	chr6:145564483-145569997	0	0
7062	Tuba3a	Tuba3a	chr6:125228292-125236060	0	0
16414	Tuba1c	Tuba1c	chr15:98860322-98868536	89.52	2577
16412	Tuba1b	Tuba1b	chr15:98761862-98764821	298.1	6782
16413	Tuba1a	Tuba1a	chr15:98780278-98783932	607.1	14070
8661	Tub	Tub	chr7:116154394-116177973	0	0
6066	Ttyh3	Ttyh3	chr5:141096537-141124985	0.1623	11
13550	Ttyh2	Ttyh2	chr11:114536782-114582298	10.85	546
7319	Ttyh1	Ttyh1	chr7:4071135-4087843	0.03574	2
14543	Ttrap	Ttrap	chr13:24923554-24934015	0.4945	14
18243	Ttr	Ttr	chr18:20823914-20832820	0	0
2635	Ttpal	Ttpal	chr2:163428050-163444749	0.8197	53.96
3859	Ttpa	Ttpa	chr4:19935575-19957932	0.02249	1
1683	Ttn	Ttn	chr2:76542041-76820604	0.002514	3
2500	Ttll9	Ttll9	chr2:152788221-152828940	0	0
16307	Ttll8	Ttll8	chr15:88744328-88784840	0	0
3757	Ttll7	Ttll7	chr3:146515331-146645714	0.1017	9
13197	Ttll6	Ttll6	chr11:95995533-96026765	0	0
14118	Ttll5	Ttll5	chr12:87165660-87394850	0.4006	31
353	Ttll4	Ttll4	chr1:74708328-74744547	0.1292	8
6885	Ttll3	Ttll3	chr6:113342491-113364563	0.2428	11
17204	Ttll2	Ttll2	chr17:7555253-7557045	0	0
8222	Ttll13	Ttll13	chr7:87391262-87405707	0	0
16266	Ttll12	Ttll12	chr15:83406240-83425540	0.9591	42
1473	Ttll11	Ttll11	chr2:35606761-35835144	0	0
5028	Ttll10	Ttll10	chr4:155408946-155424926	0	0
16262	Ttll1	Ttll1	chr15:83314199-83341337	4.006	121
2300	Ttl	Ttl	chr2:128891728-128919485	0.1385	4
10842	Ttk	Ttk	chr9:83728296-83763100	0.9625	38
3460	Ttf2	Ttf2	chr3:100742784-100773586	0.9831	65
1356	Ttf1	Ttf1	chr2:28915783-28943170	2.205	133.3
18861	Ttc9c	Ttc9c	chr19:8883565-8893784	2.335	118
7728	Ttc9b	Ttc9b	chr7:28438943-28441226	0	0
14062	Ttc9	Ttc9	chr12:82732356-82765928	0.2018	6
14164	Ttc8	Ttc8	chr12:100158822-100221448	3.146	104
14172	Ttc7b	Ttc7b	chr12:101538980-101759032	0.3187	15.97
18163	Ttc7	Ttc7	chr17:87682226-87781098	0.1939	13
15378	Ttc5	Ttc5	chr14:51385090-51405193	8.728	234
4298	Ttc4	Ttc4	chr4:106334861-106351487	4.502	135
18120	Ttc39d	Ttc39d	chr17:80615254-80617275	0	0
18221	Ttc39c	Ttc39c	chr18:12802309-12895558	0.2597	8
4178	Ttc39b	Ttc39b	chr4:82866205-82970093	0.4621	58.99
4341	Ttc39a	Ttc39a	chr4:109079705-109117348	0	0
16293	Ttc38	Ttc38	chr15:85662734-85689252	0.9335	50.99
14914	Ttc37	Ttc37	chr13:76236182-76325431	0.587	46
10489	Ttc36	Ttc36	chr9:44607483-44611034	0	0
15932	Ttc35	Ttc35	chr15:43308775-43359323	56.92	1032
15810	Ttc33	Ttc33	chr15:5135560-5168332	7.513	200
13776	Ttc32	Ttc32	chr12:9036803-9043200	0.7553	11
1672	Ttc30b	Ttc30b	chr2:75773907-75776519	1.865	70.96
1673	Ttc30a2	Ttc30a2	chr2:75814229-75816236	0	0
1674	Ttc30a1	Ttc30a1	chr2:75817163-75820024	0.1679	7
17148	Ttc3	Ttc3	chr16:94592346-94690828	3.389	360
9598	Ttc29	Ttc29	chr8:80737241-80918225	0.02786	0.9942
18096	Ttc27	Ttc27	chr17:75117090-75262910	1.242	51
6353	Ttc26	Ttc26	chr6:38331524-38377647	0.4472	26.97
13353	Ttc25	Ttc25	chr11:100406946-100433880	0	0
3178	Ttc24	Ttc24	chr3:87873332-87882226	0.02801	0.9181
15839	Ttc23l	Ttc23l	chr15:10433702-10488423	0	0
8177	Ttc23	Ttc23	chr7:74792327-74871460	1.004	33.98
4296	Ttc22	Ttc22	chr4:106295054-106312792	0	0
1596	Ttc21b	Ttc21b	chr2:66022386-66094674	0.4303	28
11171	Ttc21a	Ttc21a	chr9:119846724-119876911	0	0
12657	Ttc19	Ttc19	chr11:62094975-62129926	0.6025	30
15150	Ttc18	Ttc18	chr14:21213412-21271447	0	0
2010	Ttc17	Ttc17	chr2:94140923-94246846	1.271	85
1438	Ttc16	Ttc16	chr2:32617698-32630903	0.02569	1
13829	Ttc15	Ttc15	chr12:29375493-29435259	4.052	186
2944	Ttc14	Ttc14	chr3:33699117-33715556	0.1178	19
10051	Ttc13	Ttc13	chr8:127195227-127245875	0.4279	19
10538	Ttc12	Ttc12	chr9:49245066-49294330	0.3216	17
12383	Ttc1	Ttc1	chr11:43543508-43561475	14.1	294
2197	Ttbk2	Ttbk2	chr2:120558552-120676320	0.1511	24
17895	Ttbk1	Ttbk1	chr17:46579397-46624624	0	0
19892	Tsx	Tsx	chrX:100609806-100619919	0.08236	0.9739
16063	Tsta3	Tsta3	chr15:75755113-75760160	27.48	525
16140	Tst	Tst	chr15:78229986-78236289	0.8145	13
9484	Tssk6	Tssk6	chr8:72426114-72427417	0	0
16086	Tssk5	Tssk5	chr15:76202388-76205368	0	0
15488	Tssk4	Tssk4	chr14:56269019-56271368	0	0
4597	Tssk3	Tssk3	chr4:129166252-129168014	0	0
16688	Tssk2	Tssk2	chr16:17898730-17900117	0	0
16687	Tssk1	Tssk1	chr16:17894296-17895746	0	0
9078	Tssc4	Tssc4	chr7:150255273-150256992	3.172	63
13830	Tssc1	Tssc1	chr12:29436693-29552355	4.792	118
20093	Tsr2	Tsr2	chrX:147521852-147531061	0.7531	39
12903	Tsr1	Tsr1	chr11:74711582-74722842	2.596	128
20199	Tspy-ps	Tspy-ps	chrY:392207-395311	0	0
15885	Tspyl5	Tspyl5	chr15:33613630-33617638	0.137	7.999
11389	Tspyl4	Tspyl4	chr10:34017227-34021126	0.3521	20
2506	Tspyl3	Tspyl3	chr2:153048112-153051119	0.7533	33
20102	Tspyl2	Tspyl2	chrX:148771395-148777027	0.3735	15
11388	Tspyl1	Tspyl1	chr10:34001996-34004691	3.107	122
16265	Tspo	Tspo	chr15:83394003-83404633	55.83	696
7087	Tspan9	Tspan9	chr6:127911418-128093596	2.638	151
11953	Tspan8	Tspan8	chr10:115254340-115286672	0	0
19439	Tspan7	Tspan7	chrX:10062242-10173730	1.664	43
19965	Tspan6	Tspan6	chrX:130425609-130432968	24.46	628
3710	Tspan5	Tspan5	chr3:138405159-138567388	0.9092	42
9047	Tspan4	Tspan4	chr7:148661139-148679321	21.48	457
6296	Tspan33	Tspan33	chr6:29644256-29668558	0.03505	1
9075	Tspan32	Tspan32	chr7:150191564-150205390	0.1364	3
12019	Tspan31	Tspan31	chr10:126504346-126507317	137.3	3085
10610	Tspan3	Tspan3	chr9:55983692-56008877	3.139	79
3472	Tspan2	Tspan2	chr3:102538693-102576215	0.03237	2
2001	Tspan18	Tspan18	chr2:93041917-93174644	0.01831	1
14734	Tspan17	Tspan17	chr13:54890822-54898129	0.09198	2
11524	Tspan15	Tspan15	chr10:61648144-61693966	0.2469	12.96
15293	Tspan14	Tspan14	chr14:41719733-41780096	8.514	307
13867	Tspan13	Tspan13	chr12:36741142-36769065	0.07142	2
6248	Tspan12	Tspan12	chr6:21721395-21802515	5.626	204
7086	Tspan11	Tspan11	chr6:127837640-127903049	0.4405	27
13689	Tspan10	Tspan10	chr11:120304007-120308264	0	0
4392	Tspan1	Tspan1	chr4:115834486-115840203	0	0
11112	Tsp50	Tsp50	chr9:110760471-110767132	0	0
9837	Tsnaxip1	Tsnaxip1	chr8:108351644-108368576	0	0
10060	Tsnax	Tsnax	chr8:127536897-127558092	1.149	40
580	Tsn	Tsn	chr1:120195095-120207709	13.94	617
18288	Tslp	Tslp	chr18:32975037-32979446	0.06098	1
8351	Tsku	Tsku	chr7:105499378-105509798	1.07	36
8002	Tsks	Tsks	chr7:52198610-52213405	0	0
19893	Tsix	Tsix	chrX:100626856-100680295	0.3031	19
7898	Tshz3	Tshz3	chr7:37483137-37558476	0.3706	27
2737	Tshz2	Tshz2	chr2:169459146-169714004	0.04029	3
18652	Tshz1	Tshz1	chr18:84181019-84255954	0.4252	36
14151	Tshr	Tshr	chr12:92639433-92760981	0	0
3473	Tshb	Tshb	chr3:102581321-102586637	0	0
6310	Tsga14	Tsga14	chr6:30603457-30643682	0.6501	32
6313	Tsga13	Tsga13	chr6:30846981-30865573	0	0
140	Tsga10	Tsga10	chr1:37811621-37921924	0.1212	6
8097	Tsg101	Tsg101	chr7:54144397-54175300	10.42	278
12014	Tsfm	Tsfm	chr10:126459388-126467870	5.179	89
13595	Tsen54	Tsen54	chr11:115676053-115684416	0.1393	4
7309	Tsen34	Tsen34	chr7:3646110-3652637	2.867	57
6912	Tsen2	Tsen2	chr6:115494722-115528354	2.168	56
771	Tsen15	Tsen15	chr1:154217868-154233812	1.58	26
6005	Tsc22d4	Tsc22d4	chr5:138187224-138200975	0.4435	15
20045	Tsc22d3	Tsc22d3	chrX:137074068-137077724	5.818	167
3032	Tsc22d2	Tsc22d2	chr3:58219611-58270709	0.2178	28
15698	Tsc22d1	Tsc22d1	chr14:76904372-76907568	45.61	1110
17392	Tsc2	Tsc2	chr17:24732882-24769574	3.72	326
1349	Tsc1	Tsc1	chr2:28496763-28546687	0.4193	47
6390	Try5	Try5	chr6:41261231-41264709	0	0
6389	Try4	Try4	chr6:41252271-41255532	0	0
6391	Try10	Try10	chr6:41304104-41307943	0.07705	0.9987
1362	Trub2	Trub2	chr2:29631631-29643191	2.532	94.98
19325	Trub1	Trub1	chr19:57527418-57563418	0.8907	22
6115	Trrap	Trrap	chr5:145529661-145620642	1.024	186
6399	Trpv6	Trpv6	chr6:41570624-41586334	0	0
6400	Trpv5	Trpv5	chr6:41602769-41630722	0	0
5709	Trpv4	Trpv4	chr5:115072164-115108396	0.4949	23
12861	Trpv3	Trpv3	chr11:73081122-73110702	0	0
12662	Trpv2	Trpv2	chr11:62387988-62413807	9.086	364
12860	Trpv1	Trpv1	chr11:73051761-73074009	0	0
18823	Trpt1	Trpt1	chr19:7070621-7073536	1.32	22
15942	Trps1	Trps1	chr15:50486305-50721587	0.6058	90
474	Trpm8	Trpm8	chr1:90203287-90285426	0	0
2268	Trpm7	Trpm7	chr2:126617301-126701947	1.008	104
19030	Trpm6	Trpm6	chr19:18824473-18967001	0.01055	1
9079	Trpm5	Trpm5	chr7:150257434-150280547	0	0
8031	Trpm4	Trpm4	chr7:52558525-52589150	0.372	23
19041	Trpm3	Trpm3	chr19:22767109-22846871	0.2952	7
11638	Trpm2	Trpm2	chr10:77371910-77430202	0.1493	13
8154	Trpm1	Trpm1	chr7:71298721-71414645	0	0
19088	Trpd52l3	Trpd52l3	chr19:30078280-30080510	0	0
14775	Trpc7	Trpc7	chr13:56874469-56996949	0	0
10109	Trpc6	Trpc6	chr9:8544142-8680741	0	0
20067	Trpc5	Trpc5	chrX:140816214-141122723	0	0
2552	Trpc4ap	Trpc4ap	chr2:155460014-155518120	1.546	72
3010	Trpc4	Trpc4	chr3:53960026-54122389	0	0
2961	Trpc3	Trpc3	chr3:36519404-36589089	0	0
8414	Trpc2	Trpc2	chr7:109214227-109244930	0.182	11
10890	Trpc1	Trpc1	chr9:95607048-95650777	0	0
40	Trpa1	Trpa1	chr1:14862729-14908943	0	0
4974	Trp73	Trp73	chr4:153430358-153471282	0	0
16781	Trp63	Trp63	chr16:25802002-25892174	0.02989	2
2709	Trp53rk	Trp53rk	chr2:166619267-166624992	0.04668	3
2546	Trp53inp2	Trp53inp2	chr2:155207592-155215583	2.793	160
3825	Trp53inp1	Trp53inp1	chr4:11083588-11101524	2.178	171
12950	Trp53i13	Trp53i13	chr11:77321601-77326775	0	0
2000	Trp53i11	Trp53i11	chr2:93027741-93041914	0.129	5
1060	Trp53bp2	Trp53bp2	chr1:184339298-184392567	0.1414	9
2208	Trp53bp1	Trp53bp1	chr2:121022465-121097122	1.113	125
12739	Trp53	Trp53	chr11:69393861-69405375	132.6	3423
750	Trove2	Trove2	chr1:145597921-145624181	1	127
16416	Troap	Troap	chr15:98905404-98913838	0.276	9
20088	Tro	Tro	chrX:147079846-147091979	1.215	117
6857	Trnt1	Trnt1	chr6:106719166-106732463	9.24	297
4666	Trnp1	Trnp1	chr4:133047015-133054465	0.3736	9
4638	Trnau1ap	Trnau1ap	chr4:131867678-131885453	1.276	21
16295	Trmu	Trmu	chr15:85709757-85727823	0.9035	20
18075	Trmt61b	Trmt61b	chr17:71906367-71948101	0.2723	10
14290	Trmt61a	Trmt61a	chr12:112916316-112922113	0.2068	6
2363	Trmt6	Trmt6	chr2:132629951-132641790	3.263	134
13998	Trmt5	Trmt5	chr12:74381397-74387698	1.728	42
19972	Trmt2b	Trmt2b	chrX:130757494-130811479	2.561	120
16699	Trmt2a	Trmt2a	chr16:18248976-18253595	3.365	116
15979	Trmt12	Trmt12	chr15:58704204-58708336	1.097	66
18811	Trmt112	Trmt112	chr19:6984188-6985510	36.82	497.7
11368	Trmt11	Trmt11	chr10:30254031-30320555	0.9606	33
9655	Trmt1	Trmt1	chr8:87213177-87223686	1.48	46
4505	Trit1	Trit1	chr4:122693840-122732177	1.601	48
5987	Trip6	Trip6	chr5:137751127-137755469	6.125	157
10728	Trip4	Trip4	chr9:65680032-65756593	2.253	124
14890	Trip13	Trip13	chr13:74049910-74075215	0.3029	10
418	Trip12	Trip12	chr1:84717764-84835879	1.319	185
14181	Trip11	Trip11	chr12:103075583-103151381	0.2024	19
18030	Trip10	Trip10	chr17:57388874-57402846	3.747	110
16159	Triobp	Triobp	chr15:78813486-78836294	1.774	66
15871	Trio	Trio	chr15:27660404-27955603	0.2986	50
9376	Triml2	Triml2	chr8:44268476-44279236	0	0
9375	Triml1	Triml1	chr8:44215161-44226840	0	0
13975	Trim9	Trim9	chr12:71345524-71448601	0	0
19266	Trim8	Trim8	chr19:46576138-46590945	1.843	87
9453	Trim75	Trim75	chr8:67505550-67511543	0	0
8883	Trim72	Trim72	chr7:135147892-135154906	0	0
11135	Trim71	Trim71	chr9:114420391-114473487	0	0
12413	Trim7	Trim7	chr11:48639640-48663697	0.05027	1
2230	Trim69	Trim69	chr2:121986436-122004763	0	0
8436	Trim68	Trim68	chr7:109826094-109835840	0.8623	30
10054	Trim67	Trim67	chr8:127316919-127358602	0	0
8665	Trim66	Trim66	chr7:116592517-116637252	0.01488	2
13608	Trim65	Trim65	chr11:115986022-115992442	0.2251	10
4692	Trim63	Trim63	chr4:133871035-133885544	0	0
4581	Trim62	Trim62	chr4:128561384-128588570	0.08589	4
9455	Trim61	Trim61	chr8:67536889-67542465	0	0
9454	Trim60	Trim60	chr8:67523952-67542476	0	0
8523	Trim6	Trim6	chr7:111367309-111383666	0	0
3090	Trim59	Trim59	chr3:68839216-68848664	0.6584	28
12570	Trim58	Trim58	chr11:58453967-58465906	0	0
5983	Trim56	Trim56	chr5:137587156-137592077	0.1335	7
2894	Trim55	Trim55	chr3:19544460-19591599	0	0
5199	Trim54	Trim54	chr5:31418985-31439999	0	0
15757	Trim52	Trim52	chr14:106505415-106508497	0	0
5944	Trim50	Trim50	chr5:135829166-135843524	0	0
13607	Trim47	Trim47	chr11:115967140-115971330	0	0
3220	Trim46	Trim46	chr3:89038099-89049121	0.5552	22
3459	Trim45	Trim45	chr3:100726538-100737934	0.3685	24
2021	Trim44	Trim44	chr2:102140276-102241057	0.6974	57
10904	Trim42	Trim42	chr9:97249981-97270377	0	0
12412	Trim41	Trim41	chr11:48619906-48630893	0.5541	28
17774	Trim40	Trim40	chr17:37018543-37026990	0	0
17761	Trim39	Trim39	chr17:36395818-36408378	0.6039	27
14528	Trim38	Trim38	chr13:23874441-23883364	0	0
13099	Trim37	Trim37	chr11:86940579-87034184	0.2317	19
18461	Trim36	Trim36	chr18:46325499-46372179	0.08737	4.987
15617	Trim35	Trim35	chr14:66915862-66930261	1.976	106
8524	Trim34	Trim34	chr7:111392971-111410750	1.49	56
3482	Trim33	Trim33	chr3:103083216-103162691	0.09345	12
4153	Trim32	Trim32	chr4:65266020-65277274	5.307	247
17775	Trim31	Trim31	chr17:37035075-37047162	0	0
8528	Trim30	Trim30	chr7:111557540-111613707	2.987	164
8574	Trim3	Trim3	chr7:112758984-112782013	0.7204	31
10455	Trim29	Trim29	chr9:43118846-43144208	0	0
7468	Trim28	Trim28	chr7:13609501-13616381	2.415	114
14418	Trim27	Trim27	chr13:21271828-21284726	0.4459	15
17771	Trim26	Trim26	chr17:36974086-36996325	3.837	179
13128	Trim25	Trim25	chr11:88860717-88881607	0.2469	20
6347	Trim24	Trim24	chr6:37820811-37916289	0.3233	19
15031	Trim23	Trim23	chr13:104969178-104992128	1.113	69
8428	Trim21	Trim21	chr7:109706436-109713983	0.02538	1
3136	Trim2	Trim2	chr3:83965796-84024799	0.2744	23
12589	Trim17	Trim17	chr11:58777283-58785231	0.04087	1
12667	Trim16	Trim16	chr11:62633755-62656450	3.067	174
17772	Trim15	Trim15	chr17:36997636-37004132	0.03726	1
4029	Trim14	Trim14	chr4:46519719-46549016	0	0
15568	Trim13	Trim13	chr14:62218393-62224780	1.39	31
8525	Trim12	Trim12	chr7:111448411-111464009	2.295	50.97
12590	Trim11	Trim11	chr11:58791618-58804960	0.6403	21
17773	Trim10	Trim10	chr17:37006519-37014776	0	0
2474	Trib3	Trib3	chr2:152163161-152169796	0.2009	6
13792	Trib2	Trib2	chr12:15798533-15823591	0.9487	58
15987	Trib1	Trib1	chr15:59480209-59488654	0.2558	15
5733	Triap1	Triap1	chr5:115791256-115793561	13.62	208
9998	Trhr2	Trhr2	chr8:124880867-124884646	0	0
15934	Trhr	Trhr	chr15:44027681-44067458	0	0
11945	Trhde	Trhde	chr10:113836079-114238420	0	0
6823	Trh	Trh	chr6:92192056-92194642	0	0
5996	Trfr2	Trfr2	chr5:138011079-138028709	0	0
10947	Trf	Trf	chr9:103111206-103132616	54.27	1843
19718	Trex2	Trex2	chrX:70679044-70680682	0	0
11071	Trex1	Trex1	chr9:108960446-108961765	14.38	222
17917	Trerf1	Trerf1	chr17:47367179-47496407	0.286	18
17939	Treml4	Treml4	chr17:48403661-48414724	0.1199	3
17940	Treml2	Treml2	chr17:48439363-48451859	0	0
17943	Treml1	Treml1	chr17:48499241-48506471	0.1126	2
17938	Trem3	Trem3	chr17:48386944-48398207	0.06908	1
17942	Trem2	Trem2	chr17:48485726-48491598	101.9	1615
17937	Trem1	Trem1	chr17:48371936-48386091	0.3444	15
10484	Treh	Treh	chr9:44481321-44494387	0	0
11376	Trdn	Trdn	chr10:32803289-33196515	0	0
1182	Trdmt1	Trdmt1	chr2:13431788-13466291	0.3906	15
10624	Trcg1	Trcg1	chr9:57084363-57097671	0	0
16951	Trat1	Trat1	chr16:48734803-48772069	0	0
16018	Trappc9	Trappc9	chr15:72420050-72891634	4.97	293
13938	Trappc6b	Trappc6b	chr12:60144079-60162448	2.462	45
7586	Trappc6a	Trappc6a	chr7:20094078-20101494	4.202	47
9123	Trappc5	Trappc5	chr8:3676477-3680921	2.633	78
10476	Trappc4	Trappc4	chr9:44211842-44215631	33.33	567
4550	Trappc3	Trappc3	chr4:125939649-125953127	25.04	458
10009	Trappc2l	Trappc2l	chr8:125135526-125139490	36.31	322
20179	Trappc2	Trappc2	chrX:162878757-162890475	9.155	102
11646	Trappc10	Trappc10	chr10:77649471-77707387	0.8027	59
12728	Trappc1	Trappc1	chr11:69137488-69139295	55.85	606
20033	Trap1a	Trap1a	chrX:135868222-135872704	0	0
16560	Trap1	Trap1	chr16:4039977-4077810	16.47	551
68	Tram2	Tram2	chr1:20991459-21069290	0.04926	0.9993
3636	Tram1l1	Tram1l1	chr3:124023955-124026178	0.2161	7
34	Tram1	Tram1	chr1:13554783-13579945	2.544	107
253	Trak2	Trak2	chr1:58957294-59030326	0.6602	60
11186	Trak1	Trak1	chr9:121276076-121384036	0.5763	41
11025	Traip	Traip	chr9:107853294-107874599	0.3819	15
5791	Trafd1	Trafd1	chr5:121821735-121835624	4.421	160
17389	Traf7	Traf7	chr17:24645795-24664775	14.72	563
2017	Traf6	Traf6	chr2:101518597-101541131	0.1631	13
1111	Traf5	Traf5	chr1:193821088-193916445	0.2984	9
12963	Traf4	Traf4	chr11:77971925-77979052	0.6602	29
1120	Traf3ip3	Traf3ip3	chr1:195001699-195027740	0.4858	15
11401	Traf3ip2	Traf3ip2	chr10:39332740-39375113	0.2874	12
500	Traf3ip1	Traf3ip1	chr1:93391254-93424841	0.1402	5
14280	Traf3	Traf3	chr12:112404759-112505359	0.4876	49
1275	Traf2	Traf2	chr2:25373502-25402414	2.267	99
1463	Traf1	Traf1	chr2:34798778-34817292	0.1477	5
9808	Tradd	Tradd	chr8:107782475-107788494	0.1983	4
16311	Trabd	Trabd	chr15:88906494-88917505	2.302	80
16758	Tra2b	Tra2b	chr16:22245814-22266002	17.56	546
6488	Tra2a	Tra2a	chr6:49193920-49214051	3.043	81
2496	Tpx2	Tpx2	chr2:152673700-152721057	3.37	205
9261	Tpte	Tpte	chr8:23393913-23481890	0	0
15693	Tpt1p	Tpt1p	chr14:76245138-76248105	0	0
15692	Tpt1	Tpt1	chr14:76245138-76248105	10.29	122
5673	Tpst2	Tpst2	chr5:112705727-112744376	0.5299	14
5904	Tpst1	Tpst1	chr5:130549196-130611599	0.4781	13
17437	Tpsg1	Tpsg1	chr17:25507498-25511385	0	0
17436	Tpsb2	Tpsb2	chr17:25503278-25505037	0	0
17435	Tpsab1	Tpsab1	chr17:25480190-25482507	0	0
6725	Tprkb	Tprkb	chr6:85865751-85880276	2.654	80.89
4976	Tprgl	Tprgl	chr4:153531595-153534793	1.854	47
16780	Tprg	Tprg	chr16:25286903-25422430	0	0
6774	Tpra1	Tpra1	chr6:88852245-88862234	7.058	188
761	Tpr	Tpr	chr1:152239983-152297059	1.268	139
9823	Tppp3	Tppp3	chr8:107991392-107995267	0.8503	12
15415	Tppp2	Tppp2	chr14:52538436-52540375	0	0
14893	Tppp	Tppp	chr13:74146926-74173201	0.0273	2
183	Tpp2	Tpp2	chr1:43990852-44059816	3.722	252
8580	Tpp1	Tpp1	chr7:112893361-112900721	72.83	3706
13833	Tpo	Tpo	chr12:30739526-30817474	0	0
14672	Tpmt	Tpmt	chr13:47118912-47138586	0.9358	37
9568	Tpm4	Tpm4	chr8:74659191-74677028	186.7	5660
3248	Tpm3	Tpm3	chr3:89876616-89904526	78.06	2151
3976	Tpm2	Tpm2	chr4:43527584-43536260	39.08	1194
10744	Tpm1	Tpm1	chr9:66870400-66897020	544.9	13510
6446	Tpk1	Tpk1	chr6:43295006-43616174	0.6968	26
7036	Tpi1	Tpi1	chr6:124760610-124764314	234.3	5463
11946	Tph2	Tph2	chr10:114516666-114622069	0	0
8086	Tph1	Tph1	chr7:53902501-53922718	0.07929	2
2836	Tpd52l2	Tpd52l2	chr2:181231958-181251462	17.48	587
11373	Tpd52l1	Tpd52l1	chr10:31052186-31165727	1.355	25
2860	Tpd52	Tpd52	chr3:8929436-9004515	10.88	359
9105	Tpcn2	Tpcn2	chr7:152439828-152469832	0.9442	40
5772	Tpcn1	Tpcn1	chr5:120984166-121038622	0.3691	24.98
14802	Tpbpb	Tpbpb	chr13:61002656-61006208	0	0
14804	Tpbpa	Tpbpa	chr13:61040053-61043296	0	0
10846	Tpbg	Tpbg	chr9:85736017-85739396	0.5914	20
15427	Tox4	Tox4	chr14:52898821-52915184	5.006	325
9711	Tox3	Tox3	chr8:92771011-92872151	0	0
2626	Tox2	Tox2	chr2:163051190-163148838	0	0
3814	Tox	Tox	chr4:6614533-6917870	0.4334	18
808	Tor3a	Tor3a	chr1:158583748-158604470	1.471	70
1437	Tor2a	Tor2a	chr2:32612791-32617764	0.4579	9.996
1396	Tor1b	Tor1b	chr2:30808521-30814535	1.558	68
801	Tor1aip2	Tor1aip2	chr1:157888044-157915987	1.389	110
799	Tor1aip1	Tor1aip1	chr1:157851730-157881947	1.774	96
1397	Tor1a	Tor1a	chr2:30816147-30823404	1.828	36
3913	Topors	Topors	chr4:40206639-40216874	0.6255	35
10949	Topbp1	Topbp1	chr9:103207657-103252757	0.9001	67
16657	Top3b	Top3b	chr16:16870984-16893079	1.624	70
12628	Top3a	Top3a	chr11:60553561-60590867	1.524	83
15130	Top2b	Top2b	chr14:17197720-17263301	0.7192	59
13280	Top2a	Top2a	chr11:98854261-98885503	5.66	430
16054	Top1mt	Top1mt	chr15:75487463-75509220	2.247	62
2613	Top1	Top1	chr2:160471633-160548499	1.678	94
8408	Tomt	Tomt	chr7:109048322-109054873	0.1527	3
16979	Tomm70a	Tomm70a	chr16:57121827-57154643	1.218	67
5116	Tomm7	Tomm7	chr5:23344762-23349963	53.25	860
17928	Tomm6	Tomm6	chr17:47823691-47825335	64.95	979
4008	Tomm5	Tomm5	chr4:45118082-45120985	25.37	235
923	Tomm40l	Tomm40l	chr1:173147934-173152645	2.916	124
7598	Tomm40	Tomm40	chr7:20286662-20300778	0.2628	6
2645	Tomm34	Tomm34	chr2:163879277-163896838	5.312	178
16181	Tomm22	Tomm22	chr15:79501298-79503292	118.1	1761
10071	Tomm20	Tomm20	chr8:129458450-129469730	1.769	26
12618	Tom1l2	Tom1l2	chr11:60040216-60166407	3.058	220
13140	Tom1l1	Tom1l1	chr11:90507005-90548915	1.575	48
9588	Tom1	Tom1	chr8:77557585-77594020	11.14	371
9053	Tollip	Tollip	chr7:149067490-149088311	4.782	258
4406	Toe1	Toe1	chr4:116476608-116480164	1.47	43
16221	Tob2	Tob2	chr15:81678700-81688756	0.533	31
13148	Tob1	Tob1	chr11:94072768-94076806	0.5409	18
17667	Tnxb	Tnxb	chr17:34807480-34856572	0.06855	12
13282	Tns4	Tns4	chr11:98926993-98950620	0.02889	2
12249	Tns3	Tns3	chr11:8331655-8564538	0.624	68
333	Tns1	Tns1	chr1:73956805-74171021	0.503	73
13643	Tnrc6c	Tnrc6c	chr11:117515603-117624753	0.362	46
16205	Tnrc6b	Tnrc6b	chr15:80629040-80771516	0.405	101
8779	Tnrc6a	Tnrc6a	chr7:130267399-130338810	0.5588	69
3341	Tnrc4	Tnrc4	chr3:94282753-94296115	0	0
6080	Tnrc18	Tnrc18	chr5:143200558-143579066	0.06285	7
821	Tnr	Tnr	chr1:161453900-161855053	0	0
6295	Tnpo3	Tnpo3	chr6:29490827-29559607	8.923	516
9676	Tnpo2	Tnpo2	chr8:87560814-87581481	1.157	82
14997	Tnpo1	Tnpo1	chr13:99612036-99660997	1.836	144
16609	Tnp2	Tnp2	chr16:10788028-10788748	0	0
331	Tnp1	Tnp1	chr1:73061649-73062473	0	0
9066	Tnnt3	Tnnt3	chr7:149684741-149701913	0	0
719	Tnnt2	Tnnt2	chr1:137732963-137748838	0	0
7330	Tnnt1	Tnnt1	chr7:4456265-4467577	0.5146	7
3782	Tnni3k	Tnni3k	chr3:154449266-154718371	0.06796	3
7331	Tnni3	Tnni3	chr7:4469910-4474045	0	0
9064	Tnni2	Tnni2	chr7:149628373-149630310	2.059	20
717	Tnni1	Tnni1	chr1:137695998-137707566	0	0
2680	Tnnc2	Tnnc2	chr2:164602662-164605234	0	0
15230	Tnnc1	Tnnc1	chr14:32021498-32024897	0.1954	2
823	Tnn	Tnn	chr1:162015165-162083706	0	0
19964	Tnmd	Tnmd	chrX:130385547-130400116	0	0
19132	Tnks2	Tnks2	chr19:36908722-36967965	1.123	106
1728	Tnks1bp1	Tnks1bp1	chr2:84890617-84913205	0.6691	56
9343	Tnks	Tnks	chr8:35892233-36028744	0.3623	34
16832	Tnk2	Tnk2	chr16:32644729-32683579	0.04776	3
12764	Tnk1	Tnk1	chr11:69664601-69672219	0	0
6593	Tnip3	Tnip3	chr6:65540392-65584034	0.2733	15
5249	Tnip2	Tnip2	chr5:34838745-34856628	0.5588	16
12527	Tnip1	Tnip1	chr11:54724289-54776440	1.84	76
2914	Tnik	Tnik	chr3:28162136-28569506	0.09805	10
18025	Tnfsf9	Tnfsf9	chr17:57244808-57247180	7.927	142
4149	Tnfsf8	Tnfsf8	chr4:63493858-63522318	0.1233	4
837	Tnfsf4	Tnfsf4	chr1:163325569-163348337	0	0
838	Tnfsf18	Tnfsf18	chr1:163424788-163435419	0	0
4148	Tnfsf15	Tnfsf15	chr4:63385637-63406147	0.01178	1
18027	Tnfsf14	Tnfsf14	chr17:57328915-57333609	0.037	1
9151	Tnfsf13b	Tnfsf13b	chr8:10006633-10035999	0.364	9
12750	Tnfsf13	Tnfsf13	chr11:69496079-69499056	0.1639	4
12749	Tnfsf12-tnfsf13	Tnfsf12-tnfsf13	chr11:69496079-69509499	0.03227	1
12751	Tnfsf12	Tnfsf12	chr11:69499850-69509499	0.7398	16
15709	Tnfsf11	Tnfsf11	chr14:78677253-78707850	0	0
2910	Tnfsf10	Tnfsf10	chr3:27215999-27238587	0.4717	33.96
4941	Tnfrsf9	Tnfrsf9	chr4:150294264-150320211	0	0
4874	Tnfrsf8	Tnfrsf8	chr4:144858879-144905050	0	0
5026	Tnfrsf4	Tnfrsf4	chr4:155387804-155390698	0	0
9087	Tnfrsf26	Tnfrsf26	chr7:150793590-150813750	2.099	91
4954	Tnfrsf25	Tnfrsf25	chr4:151490452-151494220	0	0
9089	Tnfrsf23	Tnfrsf23	chr7:150851712-150871777	1.945	93
9088	Tnfrsf22	Tnfrsf22	chr7:150822630-150835543	0.2113	7
17852	Tnfrsf21	Tnfrsf21	chr17:43153504-43226137	0.5302	28
[truncated: 18,208 more rows]
